1 **Cover page**

2

3 **Title**

4 High throughput peptidomics elucidates immunoregulatory functions of plant thimet  
5 oligopeptidase-directed proteostasis

6 **Author names**

7 Anthony A. Iannetta<sup>1\*</sup>, Philip Berg<sup>2,3\*</sup>, Najmeh Nejat<sup>2</sup>, Amanda L. Smythers<sup>1</sup>, Rezwana R. Setu<sup>2</sup>,  
8 Uyen Wesser<sup>2</sup>, Ashleigh L. Purvis<sup>4</sup>, Zoe A. Brown<sup>4</sup>, Andrew J. Wommack<sup>4</sup>, Sorina C. Popescu<sup>2</sup>,  
9 Leslie M. Hicks<sup>1</sup>, and George V. Popescu<sup>2,3</sup>

10 **Affiliations**

11 <sup>1</sup>Department of Chemistry, University of North Carolina at Chapel Hill, Chapel Hill, NC

12 <sup>2</sup>Department of Biochemistry, Molecular Biology, Entomology, and Plant Pathology, Mississippi  
13 State University, Mississippi State, MS

14 <sup>3</sup>Institute for Genomics, Biocomputing, and Biotechnology, Mississippi State University,  
15 Mississippi State, MS

16 <sup>4</sup>Department of Chemistry, High Point University, High Point, NC

17 \*These authors contributed equally to this work

18 **Corresponding authors**

19 Dr. Leslie M. Hicks, Department of Chemistry, the University of North Carolina at Chapel Hill,  
20 Kenan Laboratories, 125 South Road, CB#3290, Chapel Hill, NC 27599-3290, United States

21 E-mail: [lmhicks@unc.edu](mailto:lmhicks@unc.edu)

22 Phone/Fax: (919) 843-6903 / (919) 962-2388

23 Dr. George V Popescu, Institute for Genomics, Biocomputing, and Biotechnology, Mississippi  
24 State University, Mississippi State, MS, USA

25 E-mail: [popescu@igbb.msstate.edu](mailto:popescu@igbb.msstate.edu)

26 Phone: (662) 325-7369

27 **Running title**

28 TOPs immune peptidome

29 **Keywords**

30 thimet oligopeptidase; LC-MS/MS; peptidomics; proteolysis; support vector machine; effector-  
31 triggered immunity; signaling peptide; *Arabidopsis thaliana*

32 **Abstract**

33 Targeted proteolysis activities activated during the plant immune response catalyze the synthesis  
34 of stable endogenous peptides. Little is known about their biogenesis and biological roles.  
35 Herein, we characterize an *Arabidopsis thaliana* mutant *top1top2* in which targeted proteolysis  
36 of immune-active peptides is drastically impaired during effector-triggered immunity (ETI). For  
37 effective ETI, the redox-sensitive thimet oligopeptidases TOP1 and TOP2 are required.  
38 Quantitative mass spectrometry-based peptidomics allowed differential peptidome profiling  
39 of wild type (WT) and *top1top2* mutant at the early ETI stages. Biological processes of energy-  
40 producing and redox homeostasis were enriched, and *TOPs* were necessary to maintain the  
41 dynamics of ATP and NADP(H) accumulation in the plant during ETI. Subsequently, a set of  
42 novel TOPs substrates validated *in vitro* enabled the definition of the TOP-specific cleavage  
43 motif and informed an *in-silico* model of TOP proteolysis to generate bioactive peptide  
44 candidates. Several candidates, including those derived from proteins associated with redox  
45 metabolism, were confirmed *in planta*. The *top1top2* background rescued WT's ETI deficiency  
46 caused by treatment with peptides derived from targeted proteolysis of the negative immune  
47 regulator FBR12, the reductive enzyme APX1, the isoprenoid pathway enzyme DXR, and ATP-  
48 subunit  $\beta$ . These results demonstrate TOPs role in orchestrating the production and degradation  
49 of phytocytokines.

50

51

52

## 53 **Introduction**

54 Plants have developed an innate immune response with complex, chemical-based signaling  
55 pathways to sense and respond to unfavorable environments (Chagas et al., 2018). Effector-  
56 triggered immunity (ETI) is a robust resistance response to virulence effectors deployed by  
57 pathogens to suppress and interfere with pathogen-associated molecular pattern-triggered  
58 immunity (Jones and Dangl, 2006). ETI is activated when nucleotide-binding leucine-rich repeat  
59 immune receptors recognize effectors, such as avrRpt2 from *Pseudomonas syringae* (Cui et al.,  
60 2015; Axtell and Staskawicz, 2003; Jones and Dangl, 2006). The detection of these effectors  
61 elicits the hypersensitive response (HR), a form of programmed cell death (PCD) that restricts  
62 pathogen growth (Lam et al., 2001; Heath, 2000). ETI execution is facilitated by a rapid increase  
63 in production and subsequent accumulation of reactive oxygen species (ROS), an event termed  
64 the ‘oxidative burst,’ leading to extensive post-translational protein thiol oxidation of the ETI  
65 proteome (McConnell et al., 2019). ROS accumulation elicited by ETI is biphasic with a low  
66 amplitude transient first phase, followed by a sustained phase of much higher magnitude (Torres  
67 et al., 2006; Lamb and Dixon, 1997). A positive feedback loop between ROS and defense  
68 hormones is maintained until a threshold is reached to trigger immune signal propagation,  
69 leading to ETI transcriptional reprogramming (Yoshimoto et al., 2009; Zurbriggen et al., 2010).  
70 During ETI and following the pathogen-triggered oxidative burst, damaged proteins with  
71 irreversibly oxidized residues accumulate at the site of pathogen infection; their timely removal  
72 is crucial to maintaining proteostasis (Das and Roychoudhury, 2014; Bassham, 2007).

73 Proteolysis is an irreversible protein post-translational modification essential for the functional  
74 regulation of numerous physiological and pathological processes (Rawlings and Salvesen, 2013).  
75 Complete proteolysis contributes to the maintenance of cellular proteostasis through protein  
76 degradation and turnover (Van der Hoorn and Klemenčič, 2021). In contrast, targeted or limited  
77 proteolytic cleavage can generate stable protein fragments with biological activity. More  
78 recently, targeted proteolysis has been recognized as a significant regulatory process of  
79 organismal response to pathogen attacks and developmental cues (Segonzac and Monaghan,  
80 2019; Chen et al., 2020; Wang et al., 2022). A rich repertoire of plant proteases and peptidases,  
81 estimated to represent approximately 3% of the plant genome (Van der Hoorn, 2008; Paulus and  
82 Van der Hoorn, 2019), catalyzes degradation via peptide bond hydrolysis. Proteolysis produces  
83 rapid and substantial changes in protein dynamics of biological systems through the activation of

84 highly regulated proteolytic cascades (Cheng et al., 2015; Paulus et al., 2020; Paulus and Van der  
85 Hoorn, 2019). Cytosolic proteolytic cascades complete the processing of proteasome-released  
86 peptides, whereas organelle-localized proteolytic components (*e.g.*, chloroplast and  
87 mitochondria) have a wide range of functions, including the processing of signal peptides during  
88 organellar import and removal of damaged proteins (Kidrič et al., 2014; van Wijk, 2015).  
89 Although connectivity between organellar and cytosolic proteolytic networks is not well  
90 characterized in plants, it is an essential component of the metazoan response to oxidative stress  
91 and pathogen attack (Suhm et al., 2018; Samant et al., 2018; Díaz-Villanueva et al., 2015).  
92 Substrates for diverse proteolytic cleavage have been identified in many plant species (Ziemann  
93 et al., 2018; Stegmann et al., 2017; Cheng et al., 2015). Nevertheless, the repertoire of plant  
94 peptides and functional roles of bioactive peptide products and their biogenesis remain largely  
95 uncharacterized.

96 Metazoan oligopeptidases with specificity limited to a few substrates are critical in generating  
97 bioactive peptides for stress response signaling through controlled proteolysis (Kessler et al.,  
98 2011; Ferro et al., 2014). Although these proteolytic processes are less explored in plants, plant  
99 peptidases have demonstrated other functions besides their role in protein homeostasis  
100 maintenance, including the release of defense response peptides (Tavormina et al., 2015).  
101 Endogenous peptides, termed phytocytokines, are primarily produced following partial  
102 proteolytic cleavage of precursor proteins in response to pathogen infection and amplify immune  
103 signals as part of feed-forward cellular circuits. Controlled proteolysis triggers ETI activation  
104 through specific receptor-effector recognition events. For example, the Arabidopsis immune  
105 receptor RPS2 senses the *Pseudomonas syringae* effector protease AvrRpt2 via cleavage of the  
106 guardee RIN4, prompting ETI activation (Axtell and Staskawicz, 2003); the *P. syringae* protease  
107 AvrPphB then cleaves the kinase PBS1 guarded by the immune receptor RPS5, initiating the  
108 recognition of PBS1 by RPS5 and ETI activation (Shao et al., 2003; Qi et al., 2014). These  
109 observations suggest a critical regulatory role of plant peptides in immune signaling.

110 TOP1 and TOP2 are zinc-dependent peptide hydrolases (Kmiec et al., 2016; Gomis-Rüth, 2009).  
111 These metallopeptidases are critical components in plant response to oxidative stress through  
112 SA-mediated signaling pathways and are required for a fully functioning immune response to  
113 ETI-activating pathogens (Moreau et al., 2013; Westlake et al., 2015). The Arabidopsis genome  
114 contains three genes encoding TOPs, two of which have been characterized in depth: *TOP1* and

115 *TOP2*. *TOP1* (AT5G65620, also named organellar oligopeptidase, OOP) contains an N-terminal  
116 signal peptide that mediates its localization to the chloroplast and mitochondria (Kmiec et al.,  
117 2013; Moreau et al., 2013). *TOP1* cleaves presequences containing 8-23 amino acids *in vitro* and  
118 is hypothesized to act downstream of organellar proteases for intra-organelle peptide degradation  
119 and organelle import processing (Kmiec et al., 2013). *TOP2* (AT5G10540, also known as  
120 cytosolic oligopeptidase, CyOP) functions downstream of the 20S proteasome, degrading  
121 proteasome-generated peptides during oxidative stress (Polge et al., 2009; Moreau et al., 2013;  
122 Kmiec et al., 2013). Prior evidence suggests that *TOP1* and *TOP2* have functional overlap in ETI  
123 and PCD (Westlake et al., 2015; Polge et al., 2009; Kmiec et al., 2013; Moreau et al., 2013).  
124 Both oligopeptidases are required for plant defense against avirulent strains of *P. syringae*  
125 through the activation of the resistance proteins RPS2 or RPS4 and both are necessary to regulate  
126 PCD (Moreau et al., 2013). Indirect evidence supports a role for TOPs in the controlled  
127 proteolysis of rotamase cyclophilin 1 (ROC1/CYP18-3), required for AvrRpt2 protease self-  
128 cleavage prior to the activation of ETI (Al-Mohanna et al., 2021). In a current model, TOPs are  
129 components in an interconnected organelle and cytosol proteolytic pathway that regulates the  
130 ETI oxidative burst and pathogen resistance through SA, ROS, and antioxidants (Westlake et al.,  
131 2015).

132 When nullified via genetic or chemical approaches, peptidase deficiency leads to a decrease in  
133 the accumulation of products and an increase in substrates (Lone et al., 2013; Cavalcanti et al.,  
134 2014). We hypothesized that the absence of *TOP1* and *TOP2* would increase the intracellular  
135 abundance of TOP peptide substrates, as evidenced when comparing *top1top2* with WT;  
136 therefore, peptides over-accumulating in the *top1top2* may represent direct or indirect TOPs  
137 substrates. Likewise, a significant increase in the quantity of products derived from these  
138 substrates would be expected in WT compared to the mutant. We used the double mutant instead  
139 of *top1* and *top2* single mutants for comparative analysis due to their documented shared roles in  
140 ETI and PCD (Westlake et al., 2015; Polge et al., 2009; Kmiec et al., 2013; Moreau et al., 2013).  
141 Furthermore, while *TOP1* and *TOP2* have different subcellular localizations, their functional  
142 overlap and high sequence similarity suggest a potential for redundant proteolytic activity and  
143 substrates (Kmiec et al., 2016; Moreau et al., 2013).

144 Our prior work delineated TOP peptide substrates via quantitative *in vivo* peptidomics comparing  
145 Arabidopsis WT and the *top1top2* (Iannetta et al., 2021). Herein, we implemented a similar

146 approach to characterize the peptidomes of pathogen-infected *A. thaliana* wild type (WT; Col-0  
147 accession) and *top1top2* plants during the early stages of ETI. Our characterization revealed the  
148 ETI peptidome and its temporal dynamics at critical time points post-infection. Differential  
149 peptide analysis generated a set of potential TOP substrates and an *in-silico* model of TOPs  
150 proteolytic activity. A search for bioactive peptides associated with TOP activity yielded  
151 candidates with unique sequence characteristics, whose roles in ETI were tested in WT and  
152 *top1top2*. These results highlight the complex dynamics of proteolytic events during the plant  
153 immune response. We show that predicted peptides can strongly modulate ETI phenotype in both  
154 genotypes and successfully rescue the ETI defective phenotype of *top1top2*. We propose that  
155 TOPs are a powerful model for studying the coordination between controlled proteolysis and  
156 immunity in plants.

157

## 158 **Results**

### 159 *The ETI-triggered peptidome*

160 To measure peptidome changes during the initial stages of ETI and elucidate TOP-mediated  
161 proteolytic pathways in plant defense, WT and *top1top2* rosette leaves were analyzed at 0  
162 minutes post-inoculation (mpi), 30 mpi, and 180 mpi after inoculation with *Pseudomonas*  
163 *syringae* pv. tomato DC3000 carrying the avirulence gene *avrRpt2* (*PstAvrRpt2*). Timepoint  
164 selection was designed to capture differential proteolytic events occurring in the early stages of  
165 the ETI oxidative burst and the altered dynamics of the *top1top2* delayed activation of ETI  
166 (McConnell et al., 2019).

167 Quantitative peptidomics was performed on three biological replicates at each time point in both  
168 genotypes (**Figure 1**). The analysis of the WT samples produced 2810 quantifiable peptides from  
169 698 proteins, while *top1top2* revealed 2793 quantifiable peptides from 693 proteins  
170 (**Supplemental Data Set S1**).

### 171 *Differential peptidomics reveals potential TOP substrates during ETI*

172 Two approaches were taken to assess peptide abundance differences across these conditions.  
173 First, peptide abundances were compared across infection time points within each genotype to  
174 determine peptidome differences during defense response. Second, peptide abundances were  
175 compared across genotypes to characterize ETI-mediated TOP proteolysis. Differentially  
176 abundant peptides (DAPs) between the WT and *top1top2* genotypes were identified using our  
177 pipeline (Berg et al., 2019) for label-free quantification of post-translational modifications  
178 (PTMs), as described in the methods section. Overall, 325 peptides significantly accumulated in  
179 WT and 125 accumulated in *top1top2* at 0 mpi. At 30 mpi, 276 peptides accumulated in WT and  
180 246 accumulated in *top1top2*, while at 180 mpi 59 peptides accumulated in WT and 64  
181 accumulated in *top1top2* (**Figure 2A, Supplemental Data Set S2**). The analysis of DAPs  
182 revealed that most were unique to either control (0 mpi) or early (30 mpi) *PstAvrRpt2* infection  
183 (**Figure 2B**). There are significant differences between the peptidomes of WT and *top1top2* at 0  
184 mpi, indicating compensatory effects (possibly transcriptional reprogramming) triggered by the  
185 absence of TOPs. The most significant differences between peptidomes, measured at 30 mpi,  
186 diminish at 180 mpi, suggesting convergence of the mutant and WT response dynamics in time.  
187 We also analyzed the temporal dynamics of the WT and *top1top2* peptidomes during ETI and



188 found that peptide abundance fold-changes had a smaller range in *top1top2* series as compared to  
189 the WT series (**Supplemental Figure S1**). As a result, the *top1top2* differential peptidome was  
190 drastically reduced compared to the WT within time series comparisons (**Supplemental Figure**  
191 **S2, Supplemental Data Set S3**). Most DAPs were unique to one comparison indicating a high  
192 dynamic of proteolytic activity during ETI responses. The *top1top2* differential peptidome was  
193 more than three times smaller in WT at 180 mpi vs 30 mpi, indicating a significant deficiency in  
194 proteolytic activity associated with ETI.

#### 195 *Functional characterization of the differential peptidome*

196 Since peptides accumulated in either genotype represent potential TOP substrates or TOP-  
197 cleaved peptide products, the DAP comparisons can reveal TOP-mediated proteolytic activity  
198 pre- and post-inoculation with the pathogen. We performed a gene ontology (GO) term  
199 enrichment analysis of DAPs to identify the molecular function and biological processes  
200 associated with TOP-mediated proteolysis. GO enrichment analysis using *ThaleMine*  
201 (Krishnakumar et al., 2017) identified 18 common categories for the analyzed time points  
202 (**Supplemental Data Set S4**). Significant enriched GO terms across all time points included  
203 ‘metabolic processes’, ‘photosynthesis’, and ‘peptide biosynthetic processes’; other categories of  
204 interest were ‘translation’ and ‘response to metal ions’ (**Figure 3A**). A drastic change in unique  
205 GO terms was observed between 0 mpi (‘cytoplasmic translation’ and ‘electron transport chain’)  
206 and 30 mpi (22 terms including ‘regulatory metabolic processes’, ‘ATP production’, and  
207 ‘ribosome biogenesis’), indicating a significant change in the landscape of TOP proteolyzed  
208 proteins during ETI (**Figure 3B**). The GO analysis of the peptidome temporal dynamics  
209 identified common GO categories (**Supplemental Figure S3**) as well as additional unique GO  
210 terms that characterize WT and *top1top2* ETI responses (**Supplemental Figure S4**). Most of the  
211 categorical changes in GO biological processes occurred between 30 and 180 mpi for WT,  
212 whereas they occurred between 0 and 30 mpi in *top1top2*. The analysis shows a reduction in GO  
213 terms and overrepresentation levels in *top1top2* compared to the WT. Overall, these results  
214 validate TOPs proteolytic functions under physiological conditions (Westlake et al., 2015) and  
215 suggest an essential role in ETI’s temporal dynamics.

#### 216 *TOPs are required for metabolic homeostasis during the ETI immune response*

217 Several peptides from chloroplast and mitochondrial ATP synthase subunits over-accumulated in  
218 *top1top2* relative to the WT and conversely decreased in abundance in WT post-inoculation with  
219 *PstAvrRpt2*. GO analysis of DAPs also revealed enrichment for ATP generation as well as other  
220 ATP-related metabolic processes at 30 mpi. We hypothesized that TOPs are necessary for ATP  
221 synthase processing during the ETI; thus, in *top1top2*, ATP synthase proteostasis might be  
222 dysfunctional. To verify this hypothesis, ATP cellular concentration was measured in WT and  
223 *top1top2* plants in controls (0 mpi) and following inoculation with *PstAvrRpt2* at 30 and 180  
224 mpi. The temporal dynamics of ATP concentration was markedly different between genotypes  
225 (**Figure 4A**). Whereas similar levels were recorded at 0 mpi, WT plants showed a significant  
226 burst in ATP accumulation at 30 mpi followed by a reversal to the 0 mpi level at 180 mpi. In  
227 contrast, *top1top2* plants lacked the 30 mpi burst, showing a slight increase over time in cellular  
228 ATP concentration.

229 The ATP production burst at 30 mpi was coupled with perturbation in the dynamics of metabolic  
230 and energy processes, as evidenced by enrichment of the cognate GO categories at 0 mpi, 30  
231 mpi, and 180 mpi (**Figure 3A**). In addition, the significant representation of “Reductive pentose-  
232 phosphate cycle” and “photosynthesis, dark reaction” GO categories in *top1top2* signify distinct  
233 dynamics of the NADP(H) reactions between genotypes. These observations point to a potential  
234 role for TOP-modulated proteostasis in this process, a hypothesis tested by measuring the  
235 cellular concentration of NADP(H) in both genotypes. NADP(H) concentration was measured in  
236 WT and *top1top2* at 0, 30, and 180 mpi following inoculation with *PstAvrRpt2* (**Figure 4B**). We  
237 observed a significantly higher initial (0 mpi) concentration of NADP(H) in WT compared to  
238 *top1top2*. NADP(H) cellular accumulation dynamics over the tested time interval were also  
239 markedly different between the genotypes. In WT, NADP(H) concentration decreased at 30 and  
240 180 mpi, whereas in *top1top2*, NADP(H) concentration increased significantly at both 30 and  
241 180 mpi. Such contrasting dynamics suggest a regulatory role for *TOPs* in cellular NADP(H)  
242 reduction during ETI.

#### 243 *In vitro* screening for *TOP* substrates

244 Pairwise comparisons between genotypes across infection time points identified peptides  
245 significantly more abundant in *top1top2* mutant plants. Peptides with increased abundance in the  
246 mutant likely represent either direct substrates or result from compensatory proteolytic activities

247 due to the loss of TOPs (Rei Liao and van Wijk, 2019). Screening these peptides using *in vitro*  
248 peptidase assays helps differentiate between direct and indirect TOP substrates. For testing TOP  
249 substrate candidates, purified TOP1 and TOP2 were incubated with candidate peptides. We  
250 selected peptides for TOPs substrate screening using the following criteria: 1) consideration of  
251 previously determined TOP substrate length (8-23 amino acids), 2) detection of increased  
252 peptide abundance in *top1top2* over multiple time points, 3) detection of increased abundance of  
253 peptides in *top1top2* from the same protein with overlapping recognition sequences and 4) large  
254 *in vivo* fold changes in peptide abundance. The *in vitro* enzyme assays were conducted with the  
255 13 synthetic peptides (**Supplemental Figure S5**) that met the above criteria. The selected  
256 peptides were derived from proteins involved in photosynthesis, ATP synthesis/binding, carbon  
257 fixation, and fatty acid synthesis/beta-oxidation. Substrate candidates were incubated with His-  
258 tagged recombinant isoforms of TOPs — a TOP1 isoform lacking the organellar signal peptide  
259 (Gomis-Rüth, 2009), herein named ChlTOP1, and TOP2 — followed by LC-MS analysis. Of the  
260 13 candidate peptides, 10 were identified as cleaved by ChlTOP1 and/or TOP2, representing  
261 direct TOPs substrates (**Supplemental Table S1**); ChlTOP1 had more cleavage sites (10  
262 confirmed substrates, 18 total cleavages) than TOP2 (8 confirmed substrates, 15 cleavage sites).

### 263 *Characterization of TOPs cleavage patterns using differential peptide analysis*

264 To characterize patterns of proteolytic activity in our dataset, we first examined peptides that are  
265 significantly more abundant in WT than in *top1top2* across the analyzed time points. Motif  
266 analysis was performed on these prospective TOP recognition sites using PLogo (O’Shea et al.,  
267 2013) after extending peptide termini to include the surrounding amino acids (AA). The resulting  
268 cleavage pattern shows a significant enrichment of Val at P4, Ala at P3, Val and Pro at P2, Lys at  
269 P1, Ala at P1’, Val at P2’, Ala at P3’, and Asp at P4’ (**Supplemental Figure S6**), but no strong  
270 similarity with other reported M3 metallopeptidase cleavage patterns (Rawlings, 2016).

271 We next used the peptides from the *in vitro* screen described above and previously published  
272 substrates (Al-Mohanna et al., 2021; Iannetta et al., 2021) to learn TOPs cleavage patterns.  
273 Further, we considered all peptides with a  $-\log_{10}(\text{p-value}) < 0.29$  and a  $|\text{LFC}| < 0.5$  in all three time  
274 points as negative examples. We first analyzed the amino acid composition of the peptides with  
275 at least one validated cleavage site. The most common amino acids were Ala and Gly, both small  
276 and hydrophobic, while Cys and Trp were never observed (**Supplemental Figure S7**). Next, we

277 looked at the amino acid composition around the cleavage sites. We found that Pro never  
278 occurred at P1' but was in high frequency at P2' (**Supplemental Figure S8**). We also observed  
279 that Ala tends to be found at a higher frequency toward the C-terminus. Toward the N-terminus,  
280 we observed a preference for Leu and Gly at P1 and Leu at P2. We also found a general  
281 preference for hydrophobic amino acids around the cleavage sites.

282 To increase pattern specificity, we next mined amino acid properties at predicted TOP cleavage  
283 sites. Hydrophobic (and amphipathic) amino acids were classified into three categories: *a*) large  
284 (l), consisting of Trp, Phe, and Tyr, *b*) small (s) consisting of Gly and Val, and *c*) medium (o)  
285 containing Ile, Leu, Val, and Met. Due to its distinctive pattern at P2', Pro was assigned its own  
286 category (p). Asp and Glu were classified as negatively charged (n), while Arg, Lys, and His  
287 were classified as positively charged (r). Ser, Thr, Cys, Gln, and Asn were classified as  
288 hydrophilic (i). We discovered a general preference for small amino acids toward the C-  
289 terminus. At the same time, there was a strong preference for hydrophobic amino acids toward  
290 the N-terminus, especially at P2, and that large amino acid had low frequency toward both  
291 termini and a weak preference for negatively charged amino acids at P1 and P1' (**Supplemental**  
292 **Figure S9**).

293 Next we assessed cleavage motif uncertainty to understand putative interactions between pairs of  
294 amino acids at the cleavage site. We calculated the Shannon entropy and the mutual information  
295 (Thomas and Joy, 2006) in an eight amino acid window (P4 to P4') centered at the cleavage  
296 sites. For peptides that were not cleaved, we calculated these statistics by sliding windows of  
297 eight amino acids across all detected peptides lacking a validated cleavage site (**Figure 5**).  
298 Shannon entropy (the antidiagonal) can highlight sites with a higher degree of uncertainty. At the  
299 same time, mutual information can help identify patterns of AA interaction (i.e., knowing the  
300 distribution of AA in one position informs about the distribution of AA in another position). We  
301 found that the entropy was reduced at most cleaved vs. uncleaved peptides positions, reaching  
302 the smallest values at P2, P2' and P1'. At the same time, there was a substantial increase in  
303 mutual information (up to ten-fold) between amino acid positions in cleaved vs. the uncleaved  
304 peptides. Further, P3' and P1 tended to have a larger mutual information with other cleavage site  
305 positions while P2' shared less information with the other positions. Taken together, this  
306 indicates that the patterns of amino acid properties determining TOPs cleavage recognition are

307 more specific than the general peptidome cleavage motif and could be used for substrate  
308 prediction.

### 309 *A predictive model of TOP proteolytic activity*

310 To generate a predictive cleavage pattern of TOPs, we used a least-squares support vector  
311 machine (SVM) with a Laplace kernel (Suykens and Vandewalle, 1999). SVMs have been  
312 shown to have good performance and avoid overfitting when predicting peptide cleavage sites  
313 (duVerle and Mamitsuka, 2012). The model was trained on the *in vitro* validation data and used  
314 to predict cleavage sites in the entire stress peptidome (extending sequences with up to three  
315 amino acids from the protein sequence to detect cleavage sites at peptide termini). We analyzed  
316 47,454 windows in the entire peptidome, from which we predicted 405 putative TOPs cleavage  
317 sites (**Supplemental Data Set S5**). Out of these, 173 cleavage sites mapped to peptides with  
318 significantly different abundance between *top1top2* and WT were selected for analysis. Of these,  
319 65 cleavage sites were coherent with the observed peptide abundance fold-changes and could be  
320 associated with TOPs proteolytic activity: that is, if the cleavage was predicted in the observed  
321 peptide it accumulated in *top1top2*, while if predicted in the termini it accumulated in Col-0.

322 Peptides containing these putative TOPs cleavage sites were divided into two categories: a)  
323 TOPs substrate peptides (TSP) - the cleavage site was predicted in the observed peptide, and it  
324 accumulated in *top1top2*, b) TOPs product peptides (TPP) - the cleavage site was predicted in the  
325 peptide termini, and it accumulated in WT. Out of the 66 predictions, 54 were novel, and 12  
326 were part of the training data (**Supplemental Table S2**). We then performed functional  
327 enrichment using *ThaleMine* (Krishnakumar et al., 2017) for the proteins corresponding to the  
328 TSPs and TPPs. The glucose metabolic process was enriched (**Figure 6**) mainly due to peptides  
329 originating from glyceraldehyde 3-phosphate dehydrogenases GAPA-2, GAPC2, and GAPB.  
330 Additionally, we observed TSPs from the ATP synthase delta subunit, possibly linking TOPs  
331 proteolytic activity to the observed ATP deficiency in the *top1top2* mutant. Analysis of  
332 logarithmic fold change (LFC) of TPPs and TSPs showed that the peptide with the largest LFC, a  
333 TPP, belonged to ribosomal protein RPS10C, while the third-largest LFC belonged to a GAPA-  
334 2, a TSP peptide. Other notable hits were a TSP belonging to chloroplastic DXR from the plastid  
335 non-mevalonate pathway, a TSP from the beta subunit of ATP synthase, and two peptides (a TPS  
336 and a TPP) from the L-ascorbate peroxidase 1 (APX1). Taken together, the model predicted

337 TOPs proteolytic activity associated with peptides found in redox regulation and metabolic  
338 processes and provided possible links to the observed ATP synthesis molecular phenotypes.

### 339 *TOPs cleavage motif analysis*

340 We used pLogo (O'Shea et al., 2013) for statistical analysis and visualization of TOPs cleavage  
341 motif using the AA property classes described above. We contrasted cleavage motif  
342 characteristics of peptidome-wide predicted cleavage sites vs. the TPP and TSP cleavage sites.  
343 In the peptidome-wide motif, the strongest preference was for proline at the P2' position, and  
344 small amino acids were preferred at the P1, P1', and P3' positions (**Supplemental Figure S10**).  
345 In addition, negatively charged amino acids were lacking from all positions, while some  
346 hydrophilicity was preferred at P3 and P2. The TSP and TPP cleavage site motif strongly  
347 preferred positively charged and hydrophobic amino acids at P3 and large amino acids at P2  
348 (**Figure 7A**). We also discovered an increased preference for negative amino acids at P1. The C-  
349 terminus motif showed small changes, with a strong selection for Pro at P2', small amino acid at  
350 P1', and positively charged amino acid preference at P3'.

351 We also analyzed the AA composition at predicted TPP and TSP cleavage sites (**Figure 7B**).  
352 Similarly, the primary signature of the cleavage motif was a strong preference for Pro at P2',  
353 while P2 exhibited a strong preference for phenylalanine and P1' for alanine. In addition, the  
354 peptidome-wide motif showed a preference for Ala at P1' and P3' (**Supplemental Figure S11**).  
355 The motifs analyzed here showed strong preferences for Pro and Phe, two key amino acids  
356 overrepresented in the proteolytic motifs of M3 metallopeptidases (Rawlings, 2016). However,  
357 the positions of the two signature amino acids were P2' and P2 rather than P1' and P1, while the  
358 motif specificity was lower, indicating a significant divergence of our peptidome analysis  
359 predictions from previously published MEROPS results.

### 360 *Prediction of bioactive peptides from differential peptidome*

361 Another objective of our differential peptidome analysis was the identification of bioactive  
362 peptides with ETI-related signaling functions. To develop a bioactive peptide prediction model,  
363 we scored the peptide sequences using a Markov Chain (MC) describing amino acid transition  
364 probabilities (see Methods section). The model attempted to discriminate peptides with a  
365 "unique" primary sequence characterized by multiple low amino acids transition frequencies. We  
366 used a right-tailed Z-test to identify peptide sequences significantly different from the rest of the



367 peptidome. To validate the model, we tested it on previously identified bioactive peptides  
368 involved in Arabidopsis stress signaling (Chen et al., 2020) and found that more than half had  
369 significantly high scores (**Supplemental Table S3**). We then applied the model to select a list of  
370 high-scoring peptides from our ETI-triggered peptidome; out of these, we selected 60 peptides  
371 (mapped to 35 proteins) with significantly high Z-scores and designated as DAPs (**Supplemental**  
372 **Table S4**).

373 GO enrichment analysis of these 35 proteins showed an over-representation of molecular  
374 functions related to translational regulation and mRNA binding (**Figure 8**). Four proteins  
375 participate in translation initiation: EIF4A1 (F4JEL5), EIF4A-2 (F4HV96), TRIP-1 (Q38884),  
376 and FBR12/eIF5A-2 (Q93VP3), and two proteins in translation elongation: TUFA (P17745) and  
377 eEF-1A1 (P0DH99). Most of these peptides were TOP substrates, except for two peptides from  
378 EIF4A1, which were putative TOP products. Among the predictions were two short proteins  
379 (100-140 amino acids) with disordered regions: AT2G33845 (Q8RYC3) and AT1G26550  
380 (Q9FE18) encoded by mobile RNAs moving between various organs under normal or nutrient-  
381 limiting conditions (Thieme et al., 2015). We also found several GO enrichment categories  
382 related to stress signaling containing targets from redox-related proteins. Two of these peptides,  
383 AEQAHGANSIHIHIA and GPDIPFHPG, mapped to APX1 (Q05431), an antioxidant enzyme  
384 with a role in redox homeostasis, while a third peptide, ASIKVHGVPMSTA, mapped to GSTF8  
385 (Q96266), a chloroplast glutathione S-transferase. Another intriguing bioactive peptide  
386 candidate, AMKDAIEGMNGQDL DGR, mapped to GRP7 (Q0325), a small RNA binding  
387 protein that is a part of a circadian clock-regulated toggle switch involved in stomatal opening  
388 control (Schmal et al., 2013). Lastly, we predicted two bioactive peptide candidates in ATP-  
389 synthase subunits alpha (P56757) and two in the beta subunit (P19366). All four peptides were  
390 putative TOP substrates and may be associated with the ATP molecular phenotype of *top1top2*.

391 *Predicted TOP-regulated bioactive peptides cause unique patterns of perturbation of ETI*  
392 *phenotypes*

393 Next we investigated predicted TOPs substrates from the 60 predicted bioactive peptides. Eight  
394 TOP-regulated bioactive peptides (one TOP product and seven substrates) containing at least one  
395 predicted cleavage site, were identified (**Supplemental Table S5**). The peptides mapped to six  
396 proteins: APX1, DXR, ELF5A-2/FBR12, AT5G08670, EF1A and PSBR. We next designed a

397 peptide bioactivity validation set by adding peptides with the high differential accumulation in  
398 the peptidome and with cleavage products with significant bioactivity (**Supplemental Table S6**).  
399 The screened peptides (one TOP product and seven TOP substrates) mapped to seven proteins:  
400 APX1, DXR, FBR12, AT5G08670, PSBR, ATPD and KIN2. Two peptides mapped to APX1  
401 while all other proteins contained only one putative bioactive TOP substrate. We also included  
402 an extended version of the shortest peptide mapping to DXR to a 12 AA peptide with predicted  
403 bioactivity. As controls, we added two peptides mapping to RPS10C and GAPA2 with no  
404 predicted bioactivity. Finally, we added two predicted bioactive peptides from proteins EIF4A1  
405 and GSTF8 (which do not contain TOP cleavage sites) as controls for assessing TOPs regulatory  
406 role.

407 We examined the potential of our predicted peptide products as phytochemicals, peptides with  
408 immunoregulatory functions (Hou et al., 2021). We screened all TOP-regulated bioactive  
409 peptides and controls using a flood inoculation assay to quantify their effect on the plant ETI  
410 phenotype. For this, peptides were synthesized, dissolved in plant growth media to a  
411 concentration of 100 nM, and used to treat Arabidopsis seeds as described in the *Peptide*  
412 *treatments* methods section (Zipfel et al., 2006; Chinchilla et al., 2007). For the pathogen  
413 inoculation assays, two-week-old Arabidopsis seedlings with six to eight rosette leaves were  
414 grown on a solid growth medium inoculated with *PstAvrRpt2*. Control plants were inoculated  
415 with *PstAvrRpt2* without peptide added to the growth medium. Colony-forming units (CFU)  
416 were measured at 0 days post inoculation (dpi) and 3 dpi and normalized for plant weight to  
417 assess the impact of peptide treatments on plant ETI response to *PstAvrRpt2* (**Supplemental**  
418 **Table S7**).

419 At 3 dpi, most peptide treatments significantly increased WT susceptibility to *PstAvrRpt2*  
420 infection (**Figure 9, Supplemental Figure S12**). For five of the tested peptides, IKTDKPFGIN  
421 (PSBR), SVVKLEAPQLAQ (ATPD), PTSTGAAKAVALV (GAPA2), ASIKVHGVPMSTA  
422 (GSTF8) and AGSAPEGTQFDARQF (EIF4A1) the treatment had no differentiating effect  
423 between *top1top2* and WT. Peptide ASIKVHGVPMSTA from the GSTF8 redox enzyme, which  
424 we predicted as bioactive but not a TOPs substrate or product, significantly increased plant  
425 susceptibility to *PstAvrRpt2* in WT and *top1top2*, supporting its TOP-independent role in ETI. A  
426 minor decrease in *top1top2* susceptibility compared to WT, at 3 dpi, was recorded for the peptide  
427 AGPRAGGEFGGEGKGGAPA mapping to 40S ribosomal protein RPS10C.



428 Several peptides significantly affected bacterial growth at 3 dpi in *top1top2* relative to WT. The  
429 KIN2-derived peptide SETNKNAFQAGQAAGKAE increased susceptibility to *PstAvrRpt2* in  
430 *top1top2*. The KIN2 (a stress-induced gene with a cell-to-cell mobile mRNA) peptide was  
431 independently predicted as bioactive by PeptideLocator (Mooney et al., 2013).  
432 SETNKNAFQAGQAA, another putative TOPs cleavage product of KIN2, was also identified as  
433 bioactive by PeptideLocator. Plant treatments with SETNKNAFQAGQAAGKAE caused a  
434 significant susceptibility increase only in the *top1top2* line. Conversely, treatments with peptides  
435 VLNTGAPITVPVGRATLG from the ATP synthase  $\beta$ -subunit, AEQAHGANSGIHIA and  
436 GPDIPFHPG from APX1, IEIVIH/EYDDIEIVHPQ from DXR, and  
437 SDDEHHFEASESGASKTYP from FBR12, resulted in significantly lower CFU counts in  
438 *top1top2* mutant. Treatments with the two APX1-derived peptides had some of the strongest  
439 effects on plants. AEQAHGANSGIHIA and GPDIPFHPG strongly increased *PstAvrRpt2* growth  
440 in WT but had a comparatively lower effect in the *top1top2* background. Notably, GPDIPFHPG  
441 was predicted to be bioactive, a TOPs substrate, and accumulated in *top1top2* at all timepoints.  
442 TOPs cleaved peptide products from GPDIPFHPG were also predicted as bioactive, which may  
443 account for the strong perturbation of both genotypes (third largest in WT). Notably,  
444 GPDIPFHPG and one of its TOPs-cleaved products were independently predicted as bioactive  
445 by PeptideRanker (Mooney et al., 2012). AEQAHGANSGIHIA, predicted to be bioactive and a  
446 TPP (accumulated in WT but not *top1top2* at 30 mpi), caused a severe infection in WT but only a  
447 minor increase in *top1top2* bacterial growth. Interestingly, for both APX1 peptide treatments  
448 *top1top2* rescues the WT ETI phenotype (as evidenced by decreased CFU values), albeit with  
449 distinct strengths. Together, these results argue for a substantial regulatory role of TOPs in ETI  
450 redox response through APX1 proteolysis.

451 The most substantial effect on *PstAvrRpt2* growth came from SDDEHHFEASESGASKTYP,  
452 designated as a TOP substrate and derived from the Arabidopsis eukaryotic translation initiation  
453 factor 5A (ELF5A/FBR12). Treatment with SDDEHHFEASESGASKTYP caused extreme  
454 susceptibility in WT (CFU increase of  $\sim$  four orders of magnitude over control), which was  
455 rescued to WT levels in *top1top2*. Another predicted bioactive peptide, IEIVIH, mapped to DXR  
456 from the methylerythritol 4-phosphate pathway for isoprenoid biosynthesis. Since IEIVIH was  
457 predicted to be a TOP substrate due to its over-accumulation in *top1top2*, we also screened a  
458 longer TPS peptide with a higher bioactivity score but not detected in our peptidome

459 (EYDDIEIVIHPQ). Interestingly, both IEIVIH and EYDDIEIVIHPQ increased WT  
460 susceptibility, with IEIVIH having a comparatively more substantial effect on CFU growth. On  
461 the other hand, *PstAvrRpt2*-inoculated *top1top2* was insensitive to IEIVIH or, in the case of  
462 EYDDIEIVIHPQ, had increased resistance compared to WT (**Figure 9, Supplemental Figure**  
463 **S12**). Finally, we tested VLNTGAPITVPVGRATLG mapping to mitochondrial ATP synthase  $\beta$ -  
464 subunit and found that it caused increased susceptibility in WT but reduced bacterial growth in  
465 *top1top2*. This peptide accumulated in *top1top2* at 30 mpi, correlating well with the loss of  
466 proteolytic activity in the double mutant. Further, its accumulation coincided with the peak of  
467 ATP deficiency in *top1top2* at 30 mpi.

468 All screened peptides, except AGSAPEGTQFDARQF, significantly increased susceptibility in  
469 WT; in *top1top2* the effects were mixed, with several peptides rescuing the bacterial growth  
470 phenotype to CFU levels lower than control (**Supplemental Figure S12**). Three of the screened  
471 peptides that mapped to APX1, AT5G08670, and DXR, significantly increased susceptibility in  
472 WT without any significant effect on *top1top2*, suggesting that TOP cleavage products  
473 negatively regulate ETI.

474

475

## 476 **Discussion**

477 Two main concepts dominate our understanding of proteases and peptidases: (1) proteolysis as  
478 an irreversible degradative mechanism of proteins required to maintain physiological  
479 homeostasis and (2) proteolysis as a targeted process with regulatory impacts on plant  
480 physiology. Unbiased studies characterizing peptidomes in complex biological samples and  
481 mutant backgrounds are necessary yet still scarce in plant systems. We describe a quantitative  
482 mass spectrometry-based peptidomics and computational approach to characterize TOPs'  
483 proteolytic activity and its impact on the immune response. We provide temporal snapshots of  
484 the Arabidopsis peptidome following infection with an avirulent pathogen. This strategy  
485 facilitated the identification and validation of TOPs substrates, analysis of functional relevance  
486 of predicted TOPs cleavage products, and generation of an *in-silico* model for TOPs proteolytic  
487 activity.

488 We quantified the peptidomes in WT and *top1top2* mutant and performed high-throughput data  
489 mining to identify the cleavage patterns of TOPs and select potential bioactive peptides  
490 associated with TOPs activity. We measured the dynamics of the differential peptidome at 0 mpi  
491 and two critical time points during the immune response to *PstAvrRpt2*. The differential  
492 peptidome at 0 mpi indicated that there are peptides associated with transcription regulatory  
493 processes, while the peak of the differential peptidome was at 30 mpi, showing significant  
494 changes in the TOP-related peptidome early in the ETI response. Functional analysis revealed  
495 that differential peptides at 0 mpi were enriched in photosynthetic processes. In comparison,  
496 metabolic processes, including ATP synthesis, glycolysis, and translation regulation (ribosome  
497 biogenesis and plastid translation), were enriched at 30 mpi. We discriminated TOP-cleaved  
498 peptides from the total complement of peptides processed during ETI through a multi-stage  
499 process, whereby we used *in vitro* validated TOP substrates from our previous screens (Al-  
500 Mohanna et al., 2021; Iannetta et al., 2021), as well as discovered new TOP substrates and  
501 analyzed the cleaved sequence patterns on all confirmed substrates. We used these insights to  
502 develop a support vector machine computational method that learned to differentiate cleavage  
503 patterns of validated substrates from the background peptidome and validated negative examples.  
504 The study of peptidase regulatory functions is challenging due to overlap in substrate specificity  
505 (necessary redundancy for critical degradome outcomes) as well as broad substrate recognition.

506 Despite the broad substrate selection characteristic of metallopeptidases, patterns of specificity  
507 have been described for prokaryotic and metazoan peptidases (Oliveira et al., 2001; Berti et al.,  
508 2009; Lim et al., 2007; Rawlings et al., 2018). Previous studies have shown that *Arabidopsis* and  
509 *Homo sapiens* TOPs and other related metallopeptidases do not have strict cleavage specificities  
510 (Tavormina et al., 2015; Polge et al., 2009; Al-Mohanna et al., 2021). As discussed in a recent  
511 review (Ferro et al., 2020), peptides generated as part of human THOP1 proteolytic pathways  
512 have many functions in immunity, signaling, and control of biological processes, including  
513 transcription regulation and metabolic regulation. Our analysis identified a distinct cleavage  
514 pattern for TOPs, LX↓XP (where L is large, P is proline, and X is any other property), including  
515 low frequency, large, hydrophobic amino acids alongside Pro. Our computational model predicts  
516 that 35 sites carrying this motif in the peptidome are cleaved (making up 8.6% of the TOPs  
517 predicted cleavage sites), while the remaining 57 were not. While the percentage of motif-  
518 carrying cleaved sites is very high, other determinants, such as PTMs or the composition of the  
519 remaining sequence, could account for the difference. Predicted cleavage sites had ~12 % less  
520 negative amino acids (AA), ~10 % smaller AA, ~10 % more positive AA, and 5 % less  
521 hydrophobic AA compared to sites without a cleavage prediction. Among the 35 predicted motif-  
522 carrying cleavage sites, five are in peptides that exhibit differential accumulation in the mutant,  
523 including a) MDSDFG↓IPR from protein PFP-ALPHA2 (Q9C9K3), a regulatory subunit of  
524 pyrophosphate-fructose 6-phosphate 1-phosphotransferase (validated *in vitro*), b)  
525 (SKY)G↓SPRIVNDG (parenthesis indicating extension from protein sequence) from protein  
526 CPN60B1 (P21240), the chaperonin 60 subunit beta 1, c) VDSVFQ↓APMGTGTHH, from RCA  
527 (P10896), a protein with a role in activating RuBisCO, d) VGSFE↓SPKLSSDTK, from PUB16  
528 (Q9LZW3), an E3 ubiquitin ligase, and e) GSSFL↓DPK, from protein PSBO1 (P23321), the  
529 oxygen-evolving enhancer protein 1-1 (validated *in vitro*). Less restricted cleavage patterns also  
530 correlate well with differential peptide accumulation. There were 60 predicted cleavage sites  
531 with motif LX↓XX (1280 not cleaved), with 25% differentially accumulating in *top1top2* and  
532 176 predicted cleaved sites carrying the motif XX↓XP (2968 not cleaved), with 55% of these  
533 differentially accumulating in *top1top2*. These observations reinforce that Pro in the P2' position  
534 is a strong determinant for TOP proteolytic activity and has a putative proteolytic regulatory  
535 function. GO analysis of predicted substrates further supports the idea that TOPs regulatory  
536 effect is related to redox processes and translation regulation (**Figure 3**). Thus computational

537 modeling has enabled our identification of a specific TOP cleavage motif by extracting the  
538 support vectors. Applying the model, we could discriminate the TOPs-cleaved peptides from the  
539 proteolytic activity of complementary peptidases. Despite their low occurrence, large amino  
540 acids gave the model strong discriminative power, similar to the motifs for other M3  
541 metallopeptidases in the MEROPS database. The preference for Pro at P2' and Phe at P2 mirrors  
542 the [G/Fk/spg/Pfr↓Fsr/rp/Q/] cleavage pattern reported in M3 metallopeptidases (Rawlings,  
543 2016).

544 Another essential point to emerge from this study is the prediction of bioactive peptides from a  
545 large-scale peptidomics screen using a newly derived bioinformatics method. Various machine  
546 learning techniques have been used to predict peptide bioactivity (Nardo et al., 2018; Mooney et  
547 al., 2013, 2012). In plants, limited data is available to learn bioactive peptide characteristics,  
548 making it challenging to predict patterns of bioactive peptides. Here we targeted *de novo*  
549 identification of bioactive TOPs substrate peptides. A Markov chain model discriminated  
550 peptides with distinct amino acid sequences (least frequent amino acid chains) in the measured  
551 peptidome. Of note, most bioactive peptides reported in a recent review (Chen et al., 2020) score  
552 high with our model, with half of them scoring significantly above average. Intersecting the least  
553 frequent chain peptides with TOPs substrates accumulating in *top1top2* predicted potential  
554 TOPs-generated bioactive peptides. These predicted peptides mapped to regulatory enzymes  
555 from redox and ATP metabolism, such as APX1 (L-ascorbate peroxidase 1), DXR (1-deoxy-D-  
556 xylulose 5-phosphate reductoisomerase), FBR12 (eukaryotic translation initiation factor 5A-2),  
557 and several ATP synthase subunits.

558 We validated the ETI-related bioactivity of several peptides mapping to redox modulatory  
559 enzymes using *Pst*AvrRpt2 infection assays (**Supplemental Table S7**). Significant defects in  
560 ETI occurred when plants were grown in the presence of selected peptides (**Figure 9**). In  
561 particular, we measured a significant increase in bacterial growth for WT plants grown in the  
562 presence of APX1 peptides, indicating that APX1 turnover can modulate the ETI response.  
563 GPDIPFHPG, a TOPs substrate, consistently accumulated in the *top1top2* during the early stages  
564 of ETI. Since the peptide-treated WT had increased susceptibility, an impaired TOP-dependent  
565 proteolytic cascade could likely explain the slow ETI response of *top1top2* (Westlake et al.,  
566 2015). Accumulation of APX1 cleavage product AEQAHGANS~~GI~~HIA may also inhibit ROS-  
567 mediated signaling during ETI, increasing plant susceptibility. Notably, the most considerable

568 effect of a peptide treatment was measured for a peptide from the FBR12 translation initiation  
569 elongation factor, providing a link between TOPs proteolytic activity and translational control,  
570 supported by the overrepresentation of the related GO category (**Figure 3B**). The plant ELF5A-2  
571 is critical in plant growth (Feng et al., 2007) and for the PCD triggered by bacterial pathogens  
572 (Hopkins et al., 2008). Our discovery of a putative bioactive peptide mapping to FBR12 suggests  
573 a new TOPs-related PCD regulatory pathway in ETI. Two putative bioactive peptides mapped to  
574 the NAPH consumer enzyme DXR, part of the MEP pathway that provides the basic five-carbon  
575 units for isoprenoid biosynthesis (Carretero-Paulet et al., 2002). This suggests a link between  
576 TOPs proteolytic activity and regulation of isoprenoid biosynthesis, which regulates biosynthetic  
577 pathways of GA and ABA (Xing et al., 2010). Finally, a validated peptide mapping to  
578 mitochondrial ATP synthase  $\beta$ -subunit, a catalytic subunit with roles in plant stress (Zancani et  
579 al., 2020), directly links TOPs proteolytic activity and the ATP burst dynamics observed in ETI.

#### 580 *TOP role in the regulation of ROS signaling and metabolic homeostasis*

581 An important finding from our study of peptidome dynamics regulated by TOPs is related to the  
582 functional role of peptidases in ETI. ROS accumulation elicited by ETI is biphasic with a low  
583 amplitude and transient first phase, followed by a sustained phase of much higher magnitude  
584 (Lamb and Dixon, 1997). The degradation of peptides could require higher ROS levels produced  
585 in the second oxidative burst phase. We propose that TOPs maintain proteostasis within specific  
586 processes such as photosynthesis and ATP synthesis as ETI progresses. We discovered APX1  
587 peptides as putative TOP targets and bioactive peptides. Hence, APX1 turnover—and  
588 consequently accumulation of APX1 bioactive peptides—may be essential in monitoring ROS  
589 scavenging and production.

590 In mammalian systems, the hormonal peptide atrial natriuretic peptide (ANP) activates NOX2,  
591 causing ROS accumulation (Fürst et al., 2005). Since the well-studied NADPH/respiratory burst  
592 oxidase proteins (RBHOs) are homologs of NOX2, a potential mechanism emerges whereby  
593 TOP-dependent proteolytic events influence ETI by modulating ROS signaling and PCD  
594 pathways. We found candidate cleavage sites in the cytosolic NADP-dependent isocitrate  
595 dehydrogenase (cICDH) involved in redox and metabolic control (Mhamdi et al., 2010). Further,  
596 we found several peptides from GAPDH subunits known to function in ROS regulation and plant  
597 resistance (Henry et al., 2015) and peptides from pyrophosphate-fructose 6-phosphate 1-



598 phosphotransferase subunit alpha 2 (PF3-ALPHA2) acting in glycolysis (Lim et al., 2009).  
599 These bioactive peptides could help regulate the carbohydrate fluxes between ATP production  
600 through glycolysis and NADP production via the pentose 5-phosphate pathway.

601 *ATP and NADP perturbation; the cause of the delayed ROS burst in top1top2?*

602 Cellular damage causes the release of ATP into the extracellular matrix, where it is recognized as  
603 a damage-associated molecular pattern by P2 receptor kinase 1 (P2K1) on the plasma membrane  
604 (Choi et al., 2014; Tanaka et al., 2014). This event leads to increased production of secondary  
605 messengers such as cytosolic Ca<sup>2+</sup>, nitric oxide, and ROS, which mediate plant defense responses  
606 (Tripathi et al., 2018). The chloroplastic NADP(H) pool is vital for stable ATP production from  
607 the photosynthetic machinery (Hashida and Kawai-Yamada, 2019). During stress, perturbations  
608 of the NADP(H) pool can be caused by changes in the Calvin-Benson cycle, leading to ROS  
609 accumulation in the chloroplast. The NADP(H) pool was strongly perturbed in *top1top2* at the  
610 onset of ETI compared to WT (**Figure 4**). Unlike WT, *top1top2* accumulated NADP(H) during  
611 the first 30 mpi of ETI, only to stabilize at 180 mpi. Likewise, WT accumulated a large pool of  
612 ATP during this same period. A logical explanation would be that in WT, the NADP(H) pool is  
613 converted to NAD, which is used for catabolic energy production (Hashida and Kawai-Yamada,  
614 2019) and, consequently, ATP accumulation. In *top1top2*, this rapid reshuffling of metabolic  
615 resources is perturbed and possibly delayed, which would be in accordance with its delayed ROS  
616 burst during ETI (Al-Mohanna et al., 2021). Indeed, we found a substantial change in peptide  
617 accumulations at 30 mpi between the two genotypes (**Figure 2A**), and many of the proteins these  
618 peptides belonged to are involved in ATP synthesis (**Figure 3B**). Further, *top1top2* had a  
619 decreased accumulation of NADP(H) at 0 mpi, and peptides from proteins associated with the  
620 electron transport chain unique to 0 mpi were enriched. The electron transport chain is a key  
621 driver of NADP(H) turnover in the chloroplast (Hashida and Kawai-Yamada, 2019). Thus, TOPs  
622 could play a principal role in controlling early metabolic fluxes during ETI; in *top1top2*  
623 background, deficient ROS accumulation and, consequently, ROS signaling could help explain  
624 the perturbation of its redoxome during the later stages of ETI (McConnell et al., 2019).

625 In conclusion, the data presented here provide a comprehensive view of peptide processing  
626 events associated with plant immune response and insights into the proteolytic activities and  
627 substrates of metallopeptidases. To our knowledge, this is the first peptidomics screen that

628 successfully identified bioactive peptides and ETI pathways modulated by M3 oligopeptidases.  
629 Our results reveal a pattern of peptide bioactivity, arguing that TOPs are components in a  
630 complex regulatory network of peptide substrates and products generated during ETI. We show  
631 that (1) peptides derived from TOPs proteolytic activity increase susceptibility to a bacterial  
632 pathogen in WT while rescuing the ETI phenotype in the double mutant, (2) redox processes  
633 activated during ETI are likely controlled via phyto cytokines produced by controlled proteolysis,  
634 and (3) predictive modeling methods combined with experimental validation facilitates the  
635 discovery of novel bioactive peptides. Further work on integrating targeted and systems biology  
636 approaches is key to gaining insights into protease/peptidase networks in relevant biological  
637 models to understand their role in mediating signaling and coordination with other types of  
638 regulatory protein modifications.

639

## 640 **Experimental Procedures**

### 641 *Plant Growth and Infection Assays for ETI peptidomics screen*

642 Seeds of *Arabidopsis thaliana* ecotype Columbia (Col-0) and *top1top2* were sterilized by  
643 standardized methods as described in (Lindsey III et al., 2017) and grown on MS media for 10  
644 days, then transferred to individual jiffy pellets under controlled conditions with a 12h light  
645 (12:00 pm to 12:00 am; 100  $\mu\text{mol m}^{-2} \text{s}^{-1}$  photon flux density), 12 h dark period and relative  
646 humidity of 60% to 65%. Day and night temperatures were set to 23°C and 21°C, respectively.  
647 Experiments were performed with 4 to 5-week-old, uniform appearance naïve plants.  
648 *Pseudomonas syringae* pv. *tomato* pathovar DC3000 (*Pst*) carrying *avrRpt2* were cultivated at  
649 28°C in King's B medium (Sigma Aldrich) containing Rifampicin and Kanamycin (Whalen et  
650 al., 1991). Overnight log-phase cultures were diluted to final optical densities of 600 nm ( $\text{OD}_{600}$ )  
651 for leaf inoculations of WT and *top1top2* plants. To activate ETI, two to three mature leaves at  
652 similar developmental stages were infiltrated with *PstAvrRpt2* suspensions in 10 mM  $\text{MgCl}_2$   
653 buffer at  $5 \times 10^5$  CFU  $\text{ml}^{-1}$ ; control plants were infiltrated with 10 mM  $\text{MgCl}_2$ . Infiltrated leaves  
654 were harvested at the required time points for peptidome analysis.

### 655 *Peptide Extraction*

656 Three biological replicates were used for each genotype (*i.e.*, WT and *top1top2* mutant) and  
657 infection timepoint. The preparation of peptidome samples from local tissue followed the method



658 described in (Iannetta et al., 2021). Briefly, rosette leaf tissue was ground under liquid N<sub>2</sub>, and  
659 peptides were extracted from plant material in two rounds using 10% trichloroacetic acid (TCA)  
660 in acetone. The isolation of peptides from small molecules in this extract was performed using  
661 strong cation exchange solid-phase extraction (SPE), and peptides were desalted using reversed-  
662 phase SPE. Peptide concentrations were estimated using the Pierce Quantitative Colorimetric  
663 Peptide Assay (Thermo Fisher Scientific) according to the manufacturer's protocols. Based on  
664 these results, peptide concentrations in each experiment were normalized across replicates before  
665 LC-MS/MS analysis.

#### 666 *LC-MS/MS Analysis*

667 Samples were analyzed using an Acquity UPLC M-Class System (Waters) coupled to a Q  
668 Exactive HF-X mass spectrometer (Thermo Fisher Scientific). Mobile phase A consisted of  
669 water with 0.1% formic acid (Thermo Fisher Scientific), and mobile phase B was acetonitrile  
670 with 0.1% formic acid. Injections (1  $\mu$ L) were made to a Symmetry C18 trap column (100  $\text{\AA}$ ,  
671 5 $\mu$ m, 180 $\mu$ m x 20 mm; Waters) with a flow rate of 5  $\mu$ L/min for 3 min using 99% A and 1% B.  
672 Peptides were then separated on an HSS T3 C18 column (100  $\text{\AA}$ , 1.8 $\mu$ m, 75 $\mu$ m x 250 mm;  
673 Waters) using a linear gradient of increasing mobile phase B at a flow rate of 300 nL/min.  
674 Mobile phase B increased from 5% to 40% in 90 min before ramping to 85% in 5 min, where it  
675 was held for 10 min before returning to 5% in 2 min and re-equilibrating for 13 min. The mass  
676 spectrometer was operated in positive polarity, and the Nanospray Flex source had spray voltage  
677 floating at 2.1 kV, the capillary temperature at 320  $^{\circ}$ C, and the funnel RF level at 40. MS survey  
678 scans were collected with a scan range of 350 – 2000  $m/z$  at a resolving power of 120,000 and an  
679 AGC target of  $3 \times 10^6$  with a maximum injection time of 50 ms. A top 20 data-dependent  
680 acquisition was used where HCD fragmentation of precursor ions having +2 to +7 charge state  
681 was performed using a normalized collision energy setting of 28. MS/MS scans were performed  
682 at a resolving power of 30,000 and an AGC target of  $1 \times 10^5$  with a maximum injection time of  
683 100 ms. Dynamic exclusion for precursor  $m/z$  was set to a 10 s window.

#### 684 *Database Searching and Label-Free Quantification*

685 Acquired spectral files (\*.raw) were imported into Progenesis QI for proteomics (Waters, version  
686 2.0). Peak picking sensitivity was set to the maximum of five, and a reference spectrum was  
687 automatically assigned. Total ion chromatograms (TICs) were then aligned to minimize run-to-

688 run differences in peak retention time. Each sample received a unique factor to normalize all  
689 peak abundance values resulting from systematic experimental variation. Alignment was  
690 validated (>80% score), and a combined peak list (\*.mgf) was exported out of Progenesis for  
691 peptide sequence determination by Mascot (Matrix Science, version 2.5.1; Boston, MA).  
692 Database searching was performed against the *Arabidopsis thaliana* UniProt database  
693 (<https://www.uniprot.org/proteomes/UP000006548>, 39,345 canonical entries, accessed 03/2021)  
694 with sequences for common laboratory contaminants (<https://www.thegpm.org/cRAP/>, 116  
695 entries, accessed 03/2021) appended. Target-decoy searches of MS/MS data used “None” as the  
696 enzyme specificity, peptide/fragment mass tolerances of 15 ppm/0.02 Da, and variable  
697 modifications of N-terminus acetylation, C-terminus amidation, and methionine oxidation.  
698 Significant peptide identifications above the identity or homology threshold were adjusted to less  
699 than 1% peptide FDR using the embedded Percolator algorithm (Käll et al., 2007). Mascot  
700 results (\*.xml) were imported to Progenesis for peak matching. Identifications with a Mascot  
701 score less than 13 were removed from consideration in Progenesis before exporting both  
702 “Peptide Measurements” and “Protein Measurements” from the “Review Proteins” stage.

### 703 *LC-MS/MS data analysis - peptidomics*

704 Data were parsed using custom scripts written in R for pre-processing and statistical analysis  
705 (<https://github.com/hickslab/QuantifyR>). The “Peptide Measurements” data contain peak  
706 features with distinct precursor mass and retention time coordinates matched with a peptide  
707 sequence identification from the database search results. Some features were duplicated and  
708 matched with peptides having identical sequences, modifications, and scores but alternate protein  
709 accessions. These groups were reduced to satisfy the principle of parsimony and represented by  
710 the protein accession with the highest number of unique peptides found in the “Protein  
711 Measurements” data for this experiment else, the protein with the largest confidence score was  
712 assigned by Progenesis. Some features were also duplicated with differing peptide identifications  
713 and were reduced to just the peptide with the highest Mascot ion score. An identifier was created  
714 by joining the protein accession of each peptide to the identified peptide sequence. Each dataset  
715 was reduced to unique identifiers by summing the abundance of all contributing peak features  
716 (*i.e.*, different peptide charge states and combinations of variable modifications). Identifiers were  
717 represented by the peptide with the highest Mascot score in each group. Identifiers were removed  
718 if there was not at least one condition with > 50% nonzero values across the abundance columns.

719 *Differential peptidomics analysis*

720 To compare peptide abundance between treatments, we used the linear model analysis from  
721 *limma* (Law et al., 2014; Ritchie et al., 2015) with the mean variance trend correction described  
722 in the next section. We first filtered out peptides with more than 15 missing values; then, all  
723 samples were mean stabilized using the size factor normalization described in (Anders and  
724 Huber, 2010) and were  $\log_2$  transformed (**Supplemental Figure S13**). After data normalization,  
725 multiple imputations were performed using the imputation model described below in *Data*  
726 *imputation*. We ran 1500 imputations and used a p-value cut-off of 0.05 and  $|\log_{FC}| \geq 2$ , while the  
727 p-value cut-off for the binomial test with null hypothesis  $p > 0.5$  was set to 0.05. After analysis,  
728 sets of differentially abundant peptides were compared and visualized with UpSetR (Conway et  
729 al., 2017).

730 *Mean-variance trend correction*

731 We model the standard deviation of peptides as a *gamma* function of the mean:

732 
$$\hat{\sigma}_i \sim \text{Gamma}(v, \lambda_i).$$

733 *Gamma* regression (Nelder and Wedderburn, 1972) was used to model dependency between  
734 peptide abundance variation and its mean:

$$E[\hat{\sigma}_i | \hat{\mu}_i, \hat{\beta}] = e^{\hat{\beta}_0 + \hat{\beta}_1 \hat{\mu}_i}$$

735 where  $\hat{\mu}_i$  and  $\hat{\sigma}_i$ , are the sample mean and standard deviation for the  $i$ : the peptide.

736 To remove the mean-variance trend in the data, we estimated precision weights using the *gamma*  
737 regression. The corresponding precision weight,  $w_{ijr}$ , of the data-point  $x_{ijr}$  ( $i$ :th peptide in the  
738  $j$ :th condition for the  $r$ :th replicate), was calculated as the squared inverse of the expected value  
739 of the standard deviation given the data-point and the estimated regression coefficients:

$$w_{ijr} = E[\hat{\sigma}_i | x_{ijr}, \hat{\beta}]^{-2} = e^{-2(\hat{\beta}_0 + \hat{\beta}_1 x_{ijr})}$$

740 The parameters for the regression model were estimated using the *glm* function in R (RC team  
741 2013, version 4.0.5) with the flag *family=Gamma('log')*.

742 *Data imputation*

743 We used a normal distribution as missing data imputation model:

$$Y_{ij}^{miss} \sim Normal(\hat{\mu}_{ij}, \hat{\sigma}_{ij}^2)$$

744 To estimate the mean of the normal distribution for the  $i$ :th peptide in the  $j$ :th condition,  $\hat{\mu}_{ij}$ , we  
745 used the sample mean of the non-missing data points:

$$\hat{\mu}_{ij} = \begin{cases} \bar{X}_{ij}, & \text{if at least one } x_{ij} \text{ is not missing} \\ X^{MNAR}, & \text{otherwise} \end{cases}$$

746 If all data points were missing, we assume that the data was missing not at random (MNAR) due  
747 to the concentration of the peptide being below the level of detection. For these cases, we used  
748 Tukey's lower fence as mean estimate:

$$X^{MNAR} = Q_1(X) - 1.5(Q_3(X) - Q_1(X))$$

749 To estimate the standard deviation,  $\hat{\sigma}_{ij}$ , we used one gamma regression per condition to find the  
750 expected standard deviation value given the peptide mean and the regression coefficients for the  
751 condition.

$$\hat{\sigma}_{ij} \sim Gamma(\nu_j, \lambda_{ij})$$

$$E[\hat{\sigma}_{ij} | \hat{\mu}_{ij}, \hat{\beta}_j] = e^{\hat{\beta}_{j0} + \hat{\beta}_{j1} \hat{\mu}_{ij}}$$

752 The regression parameters were estimated as for the mean-variance trend correction.

### 753 *GO analysis*

754 The UniProt accessions of the proteins mapping DAPs were converted to Araport IDs using  
755 UniProt's ID mapper. Gene ontology (GO) annotations were assigned from UniProt. GO term  
756 enrichment was performed using the ThaleMine overrepresentation testing (Fisher's Exact with  
757 false discovery rate correction).

### 758 *SVM-model proteolysis prediction*

759 We used a support vector machine (SVM) with a Laplace kernel and a least-squares estimator  
760 (duVerle and Mamitsuka, 2012) to find model parameters. From motif analysis, we found that  
761 the six positions symmetrically arranged around the cleavage site provide most of the predictive  
762 model (**Figure 5**). As before (see section *Predictive model of TOP peptidases proteolytic*  
763 *activity*), all peptides were extended by adding an "e" at the N-terminus, symbolizing that the  
764 positions were empty. Training data was generated by sliding the six-position window over all

765 validated peptides and the negative examples. In total, this generated 528 training examples, 49  
766 positive/cleaved and 479 negative/not cleaved. Due to the large discrepancy between positive  
767 and negative examples, positive examples were weighted. To determine the weights, we  
768 performed 10-fold cross-validation five times. We found that weighting the positive examples  
769 four times in the training procedure maintained a low false-positive rate and high true negative  
770 rate (**Supplemental Figure S14**) while generating a higher true-positive rate. Model training was  
771 performed in R (RC team 2013, version 4.0.5) using the *lssvm* function from the kernlab package  
772 (Karatzoglou et al., 2004) with the flags `kernel='laplacedot'`, `centered = F`, `kpar = list(sigma`  
773 `=0.1288)`, and `tol = 10-150` and prediction was done using R's `predict` function.

#### 774 *Motif Analysis*

775 In preparation for sequence logo visualization, data were parsed using custom scripts written in  
776 R. Peptides were filtered for those significantly increasing in WT ( $p$ -value < 0.05,  $\log_2$ -  
777 transformed fold change  $\leq -1$ ). Peptide termini were extended with four amino acids from  
778 corresponding protein sequences or until the protein terminus was reached. Each elongated  
779 peptide was truncated into two smaller peptides containing the extended amino acids and either  
780 the first or the last four amino acids of the original peptide sequence. These truncated peptides  
781 were filtered for those with eight residues to satisfy the input condition requiring peptides of the  
782 same length. For motif analysis, sequence logo visualizations were performed using pLOGO;  
783 positions with significant residue presence are depicted as amino acid letters sized above the red  
784 line (O'Shea et al., 2013).

#### 785 *Cleavage Motif Analysis*

786 To determine the overrepresentation of amino acids/properties (section *Characterization of TOPs*  
787 *cleavage patterns*), we used the pLogo software (O'Shea et al., 2013) without the option *remove*  
788 *duplicate sequences*. For the background, the windows without a predicted cleavage site from the  
789 SVM model were used. The foreground used is described by the context in the Results section.  
790 Fasta files inputted to pLogo was produced using the in the supplemental R code archive.

#### 791 *Bioactive Peptide Prediction Model*

792 Let  $\{X_t\}_{t=1}^N$  be a sequence of random variables that describe amino acid patterns in the primary  
793 structure of proteins (Onicescu, 1977). We define a twenty-state Markov Chain (MC) over all

794 sequential pairs of amino acids observed in a peptidome dataset. That is, if the dataset had two  
795 proteins with amino acid sequences ALLA and LLAA, then all transitions would be AL, LL, LA,  
796 LL, LA, and AA, where the first three are from the first protein and the fourth to the sixth from  
797 the second. We computed all MC parameters over the ETI peptidome dataset and used the  
798 Araport11 proteome as a reference (Cheng et al., 2017).

799 Let  $p_{ij}$  be the transition probabilities of the MC going from the  $i$ :th to  $j$ :th amino acid. We used  
800 the maximum likelihood estimator to infer the transition probabilities:

$$\hat{p}_{ij} = \frac{n_{ij}}{\sum_{k=1}^{20} n_{ik}}$$

801 where  $n_{ij}$  is the observed number of transitions from the  $i$ :th to  $j$ :th amino acid. We define the  
802 uniqueness of an amino acid sequence as:

$$PEPu = \frac{1}{M-1} \sum_{i=1}^{M-1} -\log_{10}(\hat{p}_{[i,i+1]})$$

803 where  $M$  is the number of amino acids in the peptide and  $\hat{p}_{[i,i+1]}$  is the probability of the  $i$ :th  
804 transition. The uniqueness measure of all peptides in the dataset was then standardized:

$$Z_i = \frac{PEPu_i - \mu(PEPu)}{\sigma(PEPu)}$$

805 (where  $\mu(\cdot)$  and  $\sigma(\cdot)$  are the estimated mean and variance) and a right-tailed Z-test was  
806 performed to generate a p-value for each peptide:

### 807 *In Vitro Enzyme Assay*

808 Heterologously expressed and purified TOP enzymes, and synthetic peptides were produced as  
809 described in our previous work (Iannetta et al., 2021). Synthesized peptides were solubilized in  
810 500  $\mu$ L of 100 mM NaCl in 50 mM Tris, pH 7.5. To initiate the enzyme assay, either TOP1,  
811 ChlTOP1, or TOP2 was added at a peptide:TOP ratio of 10:1. The reaction mixture was  
812 incubated at 23 °C for 30 min. Reaction mixtures were desalted using reversed-phase SPE.

### 813 *LC-MS Analysis – in vitro enzyme assays*

814 *In vitro* enzyme assay samples were analyzed using an LC-MS/MS platform, as previously  
815 described (Kirkpatrick et al., 2017), with the following specifications: 0.1% formic acid in all  
816 mobile phases and a trapping mobile phase composition of 1% acetonitrile/0.1% formic acid.

817 The MS was operated in positive-ion, high-sensitivity mode with the MS survey spectrum using  
818 a mass range of  $m/z$  350–1600 in 250 ms and information-dependent acquisition of MS/MS data  
819 using an 8 s dynamic exclusion window. The first 20 features above an intensity threshold of 150  
820 counts and having a charge state of +2 to +5 were fragmented using rolling collision energy (CE;  
821  $\pm 5\%$ ).

#### 822 *Quantitative ATP Luciferase Assay*

823 Four biological replicates of frozen rosette leaf tissue (~0.05 g) were pulverized via three, 5 min  
824 rounds using a TissueLyser II (Qiagen, Germantown, MD) cell disrupter at 30 Hz before  
825 homogenization in 250  $\mu$ L of water. The homogenate was vortexed and incubated at 100 °C for  
826 30 min before centrifugation at 10,000  $g$  for 15 min at 4 °C. The supernatant was collected,  
827 protein concentrations were estimated using the CB-X assay (G-Biosciences, St. Louis, MO)  
828 according to the manufacturer's protocol, and these concentrations were used to normalize  
829 replicates following luminescence analysis. The ATP determination kit (Invitrogen, Waltham,  
830 MA) was used to quantify cellular ATP concentrations according to the manufacturer's protocol.  
831 Briefly, 20  $\mu$ L of sample and 180  $\mu$ L of 1 mM DTT, 0.5 mM luciferin, and 1.25  $\mu$ g/mL firefly  
832 luciferin in 1x reaction buffer were added to a 96-well plate and incubated in the dark for 5 min  
833 at RT. Luminescence was measured and compared to an ATP standard calibration curve to  
834 convert luminescence to ATP concentration. Each biological replicate was analyzed in technical  
835 triplicates.

#### 836 *Quantitative NADP<sup>+</sup>/NADPH Enzyme Cycling Assay*

837 The NADP/NADPH Quantitation Kit (Sigma-Aldrich, Burlington, MA) was used to quantify  
838 cellular NADP<sup>+</sup>/NADPH concentrations according to the manufacturer's protocol. Briefly, five  
839 biological replicates of frozen rosette leaf tissue (~0.05 g) were pulverized via three 5 min  
840 rounds using a TissueLyser II (Qiagen) cell disrupter at 30 Hz before homogenization in 500  $\mu$ L  
841 of the provided extraction buffer. The homogenate was vortexed and incubated at -20 °C for 10  
842 min before centrifugation at 10,000  $g$  for 15 min at 4 °C. The supernatant was collected and  
843 filtered through a 10 kDa molecular weight cutoff filter by centrifugation at 3,200  $g$  for 30 min at  
844 4 °C. Prior to filtering, an aliquot was reserved for protein quantification via the CBX assay (G-  
845 Biosciences); this protein concentration was used to normalize NADP<sup>+</sup>/NADPH based on protein  
846 quantification following analysis. For total NADP<sup>+</sup>/NADPH quantification, 200  $\mu$ L of the filtrate



847 was incubated for 30 min at 60 °C before centrifugation at 10,000 g for 5 min at 4 °C. After  
848 incubation, 10 µL of developer solution was added, and mixtures were incubated in the dark for  
849 30 min at RT. Absorbances were measured ( $\lambda = 450$  nm) and compared to an NADP<sup>+</sup>/NADPH  
850 standard calibration curve to convert absorbance to NADP<sup>+</sup>/NADPH concentration. Each  
851 biological replicate was analyzed in technical duplicates.

### 852 *Peptide treatments*

853 Selected peptides were synthesized via Fmoc-based solid-phase peptide synthesis using a flow  
854 chemistry-based platform, which was built in-house based on the prior invention (Mijalis et al.,  
855 2017; Simon et al., 2014), and lyophilized. The molecular weights of the peptides were  
856 calculated using their sequences ([https://www.bioinformatics.org/sms/prot\\_mw.html](https://www.bioinformatics.org/sms/prot_mw.html)).  
857 Lyophilized peptide powder was measured with a digital analytical balance (Accuris instruments,  
858 W3100 series) and resuspended in a sterile buffer containing 100 mM NaCl (Sigma Life  
859 Sciences), 50 mM Tris (Fisher Scientific) at pH 7.5. For assays, the peptide solutions were  
860 further diluted to 100 nM aliquots to avoid freeze-thaw cycles and stored at -20°C before use.  
861 Arabidopsis seedlings were grown on ½ MS solid medium into 12-well plates filled halfway for  
862 flood inoculation assays. The growth medium was autoclaved and cooled to 55°C in a water bath  
863 before adding the peptide preparations.

### 864 *Flood Inoculation Assays for ETI Phenotype Screening*

865 *Arabidopsis thaliana* seeds were sterilized with 70% (v/v) ethanol and 50% (v/v) bleach solution  
866 (Clorox, 4.5% sodium hypochlorite) followed by washing with sterilized distilled water as  
867 described in (Lindsey III et al., 2017). The seeds were transferred to square Petri dishes  
868 containing solid ½ MS medium (2.2 g/L, without vitamins) with 10 g/L sucrose (MP Biomedical,  
869 LLC, USA) and 0.3 % Phytigel™, in the absence (control) or presence of 100 nM peptide  
870 (treatment), as described in (Ishiga et al., 2017). Then plates were transferred to 4°C for three  
871 days, then to a growth chamber with photoperiods of 12h light (100-200 µmol m<sup>-2</sup> s<sup>-1</sup> photon  
872 flux density) followed by 12 h dark. The growth chamber temperature was set to 23°C during the  
873 day and 21°C during the night and relative humidity of 60%-65%. The seedlings were grown for  
874 2 weeks before inoculation. *Pst*AvrRpt2 was grown in liquid King's medium B containing  
875 kanamycin and rifampin (50 and 25 µg/ml, respectively) and cultured in 28°C on a shaker  
876 incubator. After 8-10 hours, 1 ml bacterial culture was centrifuged, at 9600 RPM for two



877 minutes, and the pellet was resuspended in 1 mL of 10mM MgCl<sub>2</sub> buffer. The bacterial density  
878 was then adjusted to an OD<sub>600</sub> value of 0.1 and used in serial dilution to produce a bacterial  
879 inoculum of 5×10<sup>3</sup> colony-forming unit (CFU) per ml.

880 Flood inoculation was performed on Arabidopsis seedlings (Ishiga et al., 2011, 2017). Briefly,  
881 0.025% Silwet L-77 (Lehle Seed, TX, USA) was added to the bacterial inoculum and mixed  
882 gently. 40 ml of bacterial inoculum was distributed in the plates containing the two-week-old  
883 seedlings and incubated for 3 min at room temperature, after which the bacterial inoculum was  
884 discarded. For 3-dpi measurements, seedlings were sterilized in 5% H<sub>2</sub>O<sub>2</sub> (Sigma-Aldrich),  
885 followed by a wash with sterile distilled water (sdH<sub>2</sub>O). They were weighed and then  
886 homogenized in 300 µl sdH<sub>2</sub>O. Serial dilution was performed six times (for 0dpi) and ten times  
887 for (3dpi) with 10 µl sample/dilute and 90 µl sdH<sub>2</sub>O. The diluted cultures were plated on King  
888 Agar B (Sigma-Aldrich) containing kanamycin and rifampin (50 and 25 µg/ml, respectively) and  
889 incubated at 28°C for 2 days. The bacterial CFU was counted and normalized with the total  
890 weights of the plant tissue sample collected. Significance testing was performed using a pooled-  
891 variance t-test.

## 892 **Data Availability**

893 The mass spectrometry peptidomics data have been deposited to the ProteomeXchange  
894 Consortium via the PRIDE partner repository (Perez-Riverol et al., 2019) and can be accessed  
895 with the dataset identifier PXD019812 and 10.6019/PXD019812.

896 Username: reviewer20537@ebi.ac.uk

897 Password: IIhTfPXt

## 898 **Code availability**

899 The peptidome normalization, imputation, and differential abundance analysis pipeline code is  
900 available at: <https://github.com/PhilipBerg/pair>. An archive of the R-code and the data analyzed  
901 in this paper is available for download at: <https://figshare.com/s/ccda4b4596909ded3d26>.

## 902 **Acknowledgments**

903 This work was supported by the National Science Foundation (collaborative NSF-MCB  
904 1714405/ 1714157 to S.C.P., G.V.P., and L.M.H) and a National Science Foundation Major

905 Research Instrumentation award (CHE-1726291 to L.M.H) for the Q Exactive HF-X mass  
906 spectrometer.

### 907 **Author contributions**

908 GVP, LH and SCP devised the project and the main conceptual idea; NN grew plants, performed  
909 all plant ETI assays, and collected the plant material for the peptidomics screen; SCP supervised  
910 the plant ETI assays and enzyme characterization assays; AAI carried out mass spectrometry  
911 experiments and analysis of resultant data and performed in vitro screening of TOPs substrates;  
912 AS performed the ATP luciferase and NADP(H) enzyme cycling assay; LMH supervised the  
913 mass spectrometry, ATP, and NADP(H) assays and analyses; AP, ZB and AW performed the  
914 peptide synthesis; PB implemented the statistical data analysis pipeline and the machine learning  
915 code; PB and GVP performed the statistical analysis of data; RS and UW performed flood  
916 inoculation assays and peptide treatments; GVP supervised the data analysis, computational  
917 modeling and peptide bioactivity validation; GVP, PB, AAI and SCP wrote the manuscript;  
918 LMH, AW, AS and RS edited and contributed to the writing. All authors discussed the results  
919 and commented on the article.

920

### 921 **Figure Legends**

922 **Figure 1:** The peptidomes of WT and *top1top2* rosette leaves were analyzed following pathogen  
923 inoculation with *Pst* avrRpt2 to measure peptidome changes during the initial stages of ETI and  
924 elucidate TOP-mediated proteolytic pathways during plant defense. Rosette leaves were ground  
925 under liquid nitrogen before extracting peptides with 10% TCA in acetone. Peptides were  
926 isolated from small molecules with SCX SPE before peptide quantitation. Peptide concentrations  
927 across replicates were quantified and normalized before liquid chromatography-tandem mass  
928 spectrometry (LC-MS/MS) analysis.

929 **Figure 2:** The distribution of the decision of the differential abundance analysis for the peptides.  
930 (A) shows a MA-plot with the title of each facet corresponding to the decision of that  
931 comparison. Each dot corresponds to a peptide, and the x-axis shows the mean of that peptide for  
932 that comparison, while the y-axis shows the log fold-change, and a positive value indicates  
933 accumulation in *top1top2*. Peptides that were imputed were represented with their median mean

934 and fold change from all imputations. **(B)** UpSetR analysis of the significant hits. The figure  
935 shows the size of the set(s) marked with a dot below the bars.

936 **Figure 3:** GO-enrichment of the differentially abundant peptides at the different time points. The  
937 x-axis shows the category, and the y-axis shows the  $-\log_{10}(\text{p-value})$  of the statistical test for  
938 overrepresentation. **(A)** shows common GO terms enriched in all time points with the title of the  
939 facets indicating the time point. **(B)** shows the GO terms unique to different time points. GO-  
940 enrichment of biological process unique to 0 mpi and 30 mpi for the significant proteins. Red  
941 color indicates the GO-terms unique to 0 mpi, and blue indicates the same but for 30 mpi.

942 **Figure 4:** The metabolic state of Arabidopsis WT and *top1top2* plant lines following inoculation  
943 with *Pst* avrRpt2. **(A)** ATP was quantified using a luciferase assay (\*:  $p < 0.05$ , ns: not  
944 significant, following two-sample equal variance *t*-test). **(B)** NADP<sup>+</sup> and NADPH were  
945 quantified using an enzyme cycling assay (\*:  $p < 0.05$ , ns: not significant, following two-sample  
946 equal variance *t*-test).

947 **Figure 5:** Comparison of the information of the amino acid properties around the validated  
948 cleavage sites and for a sliding window of size six for the amino acid properties in the peptides  
949 not cleaved as well as the negative examples. The x- and y- axes show the different positions  
950 around either the cleavage sites or the sliding window. The diagonal shows the entropy values,  
951 and the remaining cell show the mutual information between the positions.

952 **Figure 6:** Shows the GO-enrichment of the proteins with peptides that had predicted cleavage  
953 sites that coincided with their fold-change. The labels correspond to the GO-term; red labels  
954 show biological processes while blue shows molecular function. The x-axis indicates the number  
955 of genes in the category, and the y-axis shows the  $-\log_{10}(\text{p-value})$  of the statistical test for  
956 overrepresentation.

957 **Figure 7:** pLogo shows the overrepresentation of amino acid properties for the putative TOPs  
958 cleavage sites. **(A)** shows the motif for all sites predicted as cleaved. **(B)** shows the motif of the  
959 TPP and TPS.

960 **Figure 8:** GO-enrichment of predicted signaling peptides differentially expressed between WT  
961 and *top1top2*. The labels correspond to the GO-term; red labels show biological processes while

962 blue shows molecular function. The x-axis indicates the number of genes in the category, and the  
963 y-axis shows the  $-\log_{10}(\text{p-value})$  of the statistical test for overrepresentation.

964 **Figure 9:** Peptide treatment causes perturbations in bacterial CFU during ETI. Colors indicate  
965 the peptide treatment: *control* or *peptide sequence* (with the corresponding protein in  
966 parenthesis) for plants grown without/with peptide treatment. The x-axis shows the measurement  
967 time. The y-axis in (A) shows the mean value of five replicates in  $\log_{10}(\text{CFU}/\text{mg})$ ; error bars  
968 correspond to one standard error of the mean, and each black dot indicates one measurement. (B)  
969 shows the distribution of the test statistic between *top1top2* and WT. The y-axis shows the  
970 difference in mean between the genotypes with a 95 % confidence interval inferred from an  
971 equal variance t-test. The dashed line marks the null hypothesis of the test statistic. A confidence  
972 interval without overlap with the null hypothesis is significant at the 0.05 significance level.

973 **Supplemental Figure S1:** MA-plots showing the distribution of the decision of the differential  
974 abundance analysis for the peptides in time-course analysis. The title of each facet corresponds  
975 to the decision of that comparison. Each dot corresponds to a peptide, and the x-axis shows the  
976 mean of that peptide for that comparison, while the y-axis shows the log fold-change, and a  
977 positive value indicates accumulation in *top1top2*.

978 **Supplemental Figure S2:** UpSetR of the significant hits in time-course analysis. It shows the  
979 size of the set(s) marked with a dot below the bars.

980 **Supplemental Figure S3:** Common GO terms enriched in time-course analysis. The title of the  
981 facets indicates the p-value and number of genes in the category for that comparison. The labels  
982 in the plot correspond to the different categories. The x-axis shows the number of genes in the  
983 category, and the y-axis shows the  $-\log_{10}(\text{p-value})$  of the statistical test for overrepresentation.

984 **Supplemental Figure S4:** GO-enrichment of biological process unique in the time-course  
985 analysis. The x-axis shows the number of genes in the category, while the y-axis shows the -  
986  $\log_{10}(\text{p-value})$  of the statistical test for overrepresentation. Red indicates the GO-terms unique to  
987 0 mpi, and blue indicates the same but for 30 mpi.

988 **Supplemental Figure S5: A) assay\_VVISAPSKDAPM:** In vitro enzymatic assays including  
989 the synthetic peptide with the sequence VVISAPSKDAPM. (A) Extracted ion chromatograms  
990 and mass spectrum of the N-terminal product VVISAPSKD (red, m/z 915.51, +1 charge state

991 and m/z 458.26, +2 charge state) indicate this cleavage site for TOP2. (B) Extracted ion  
992 chromatograms and mass spectra of the N-terminal product VVIS (blue, m/z 417.27, +1 charge  
993 state) indicate this cleavage site for CHLTOP1 and TOP2. All observed masses match the  
994 theoretical peptide masses within 7 ppm mass error.

995 **B) assay\_SVVKLEAPQLAQ:** In vitro enzymatic assays including the synthetic peptide with  
996 the sequence SVVKLEAPQLAQ. (A) Extracted ion chromatograms and mass spectra of the N-  
997 terminal product SVVKLEAPQ (red, m/z 485.78, +2 charge state) indicate this cleavage site for  
998 CHLTOP1 and TOP2. (B) Extracted ion chromatograms and mass spectra of the N-terminal  
999 product SVVKLE (blue, m/z 674.41, +1 charge state) and C-terminal product APQLAQ (green,  
1000 m/z 627.35, +1 charge state) indicate this cleavage site for CHLTOP1 and TOP2. (C) Extracted  
1001 ion chromatograms and mass spectra of the N-terminal product SVVKL (orange, m/z 545.37, +1  
1002 charge state) indicate this cleavage site for CHLTOP1 and TOP2. All observed masses match the  
1003 theoretical peptide masses within 8 ppm mass error.

1004 **C) assay\_IKTDKPFGIN:** In vitro enzymatic assays including the synthetic peptide with the  
1005 sequence IKTDKPFGIN. (A) Extracted ion chromatograms and mass spectra of the N-terminal  
1006 product IKTDKPF (red, m/z 848.49, +1 charge state and m/z 424.75, +2 charge state) indicate  
1007 this cleavage site for CHLTOP1 and TOP2. (B) Extracted ion chromatograms and mass spectra  
1008 of the C-terminal product KPFGIN (blue, m/z 675.38, +1 charge state) indicate this cleavage site  
1009 for CHLTOP1 and TOP2. All observed masses match the theoretical peptide masses within 4  
1010 ppm mass error.

1011 **D) assay\_MDSDFGIPR:** In vitro enzymatic assays including the synthetic peptide with the  
1012 sequence MDSDFGIPR. Extracted ion chromatograms and mass spectra of the N-terminal  
1013 product MDSDFG (red, m/z 671.23, +1 charge state) indicate this cleavage site for CHLTOP1  
1014 and TOP2. All observed masses match the theoretical peptide masses within 3 ppm mass error.

1015 **E) assay\_TGDQRLLDAS:** In vitro enzymatic assays including the synthetic peptide with the  
1016 sequence TGDQRLLDAS. Extracted ion chromatograms and mass spectra of the N-terminal  
1017 product TGDQRL (red, m/z 802.44, +1 charge state and m/z 401.72, +2 charge state) indicate  
1018 this cleavage site for CHLTOP1 and TOP2. All observed masses match the theoretical peptide  
1019 masses within 5 ppm mass error.

1020 **F) assay\_DPFGLGKPA:** In vitro enzymatic assays including the synthetic peptide with the  
1021 sequence DPFGLGKPA. Extracted ion chromatograms and mass spectra of the N-terminal  
1022 product DPFGLG (red, m/z 605.29, +1 charge state) indicate this cleavage site for CHLTOP1  
1023 and TOP2. All observed masses match the theoretical peptide masses within 4 ppm mass error.

1024 **G) assay\_GSSFLDPK:** In vitro enzymatic assays including the synthetic peptide with the  
1025 sequence GSSFLDPK. Extracted ion chromatograms and mass spectra of the N-terminal product  
1026 GSSFL (red, m/z 510.26, +1 charge state) indicate this cleavage site for CHLTOP1 and TOP2.  
1027 All observed masses match the theoretical peptide masses within 2 ppm mass error.

1028 **H) assay\_VLNTGAPITVPVGRATLG:** In vitro enzymatic assays including the synthetic  
1029 peptide with the sequence VLNTGAPITVPVGRATLG. (A) Extracted ion chromatograms and  
1030 mass spectra of the N-terminal product VLNTGAPITVPVGRA (red, m/z 732.93, +2 charge  
1031 state) indicate this cleavage site for TOP2. (B) Extracted ion chromatograms and mass spectra of  
1032 the C-terminal product RATLG (blue, m/z 517.31, +1 charge state) indicate this cleavage site for  
1033 CHLTOP1 and TOP2. (C) Extracted ion chromatograms and mass spectra of the N-terminal  
1034 product VGRATLG (green, m/z 673.40, +1 charge state) indicate this cleavage site for  
1035 CHLTOP1 and TOP2. (D) Extracted ion chromatograms and mass spectra of the N-terminal  
1036 product VLNTGAPIT (orange, m/z 885.50, +1 charge state) indicate this cleavage site for  
1037 CHLTOP1 and TOP2. All observed masses match the theoretical peptide masses within 7 ppm  
1038 mass error.

1039 **I) assay\_AKDELAGSIQKGV:** In vitro enzymatic assays including the synthetic peptide with  
1040 the sequence AKDELAGSIQKGV. Extracted ion chromatograms and mass spectrum of the N-  
1041 terminal product AKDELAGSIQ (red, m/z 516.27, +2 charge state) indicate this cleavage site for  
1042 CHLTOP1. All observed masses match the theoretical peptide masses within 1 ppm mass error.

1043 **J) assay\_TGGGASLELLEKPLPG:** In vitro enzymatic assays including the synthetic peptide  
1044 with the sequence TGGGASLELLEKPLPG. (A) Extracted ion chromatograms and mass  
1045 spectra of the N-terminal product TGGGASLELLE (red, m/z 532.77, +2 charge state) and C-  
1046 terminal product GKPLPG (blue, m/z 568.35, +1 charge state) indicates this cleavage site for  
1047 CHLTOP1. (B) Extracted ion chromatograms and mass spectrum of the C-terminal product  
1048 EGKPLPG (green, m/z 697.39, +1 charge state) indicate this cleavage site for CHLTOP1. (C)  
1049 Extracted ion chromatograms and mass spectrum of the N-terminal product TGGGASLE



1050 (orange, m/z 691.33, +1 charge state) indicate this cleavage site for CHLTOP1. (D) Extracted ion  
1051 chromatograms and mass spectrum of the N-terminal product TGGGASL (purple, m/z 562.28,  
1052 +1 charge state) indicate this cleavage site for CHLTOP1. All observed masses match the  
1053 theoretical peptide masses within 8 ppm mass error.

1054 **Supplemental Figure S6.** Sequence logo visualizations of TOP cleavage specificity using  
1055 theoretical and determined TOP substrates. Positions with significant residue presence are  
1056 depicted as amino acid letters sized above the red line (O'Shea et al., 2013). (A) Motif analysis  
1057 of the extended termini of peptides significantly increased in the wild-type plants across the  
1058 infection time points.

1059 **Supplemental Figure S7:** Histogram of the amino acid composition and the number of observed  
1060 cleavage sites of the peptides with validated cleavage sites. The y-axis shows the number of  
1061 observations, and the x-axis shows the different amino acids.

1062 **Supplemental Figure S8:** The observed number of amino acids towards the C-or N-terminus  
1063 (indicated by the facet title) around the validated cleavage sites. The x-axis shows the number of  
1064 positions away from the cleavage site, and the y-axis shows the different properties.

1065 **Supplemental Figure S9:** The observed number of distinct amino acid properties towards the C-  
1066 or N-terminus (as indicated by the facet title) around the validated cleavage sites. The x-axis  
1067 shows the number of positions away from the cleavage site, and the y-axis shows the different  
1068 properties. See section *Characterization of TOPs cleavage patterns* to describe the property  
1069 categories.

1070 **Supplemental Figure S10:** pLogo showing the overrepresentation of different amino acid  
1071 properties over- or under-represented at the predicted cleavage sites. See  
1072 section *Characterization of TOPs cleavage patterns* for a description of the property categories  
1073 and see (O'Shea et al., 2013) for more details on interpreting the plot.

1074 **Supplemental Figure S11:** pLogo showing the overrepresentation of different amino acids over-  
1075 or under-represented at the predicted cleavage sites.

1076 **Supplemental Figure S12:** Significant changes in bacterial growth between peptide treatment  
1077 and control (no treatment) in WT and *top1top2*. Colors indicate the peptide treatment with the  
1078 protein they belong to in parenthesis; the x-axis shows the measurement time; the y-axis shows

1079 the difference in mean between peptides and control with a 95 % confidence interval inferred  
1080 from an equal variance t-test. The dashed line marks the null hypothesis of the test statistic. A  
1081 confidence interval without overlap with the null hypothesis is significant at the 0.05 significance  
1082 level.

1083 **Supplemental Figure S13:** Median stabilization between samples from the data normalization.  
1084 The y-axis shows the data values either normalized using the size factor normalization described  
1085 in (Anders and Huber, 2010) in the blue boxes or the raw data after log<sub>2</sub> transformation in the  
1086 red boxes. The x-axis shows the different samples.

1087 **Supplemental Figure S14:** Boxplots showing the results of k-fold cross-validation with  
1088 different weights of the positive/cleaved examples. The titles of each facet indicate the amount of  
1089 weighting given to the positive examples. The x-axis shows the evaluation metrics; FPR is the  
1090 false positive rate, TNR is the true negative rate, and TPR is the true positive rate. The y-axis  
1091 shows the values of the different metrics. The metrics were calculated without the weighting.

1092

## 1093 **Tables**

1094 **Supplemental Table S1:** Synthetic AtTOPs peptide substrates tested in in vitro enzyme assays.  
1095 All peptides were significantly increasing in the top1top2 mutants at one or more timepoints and  
1096 the order of the timepoints matches the order of the listed fold changes in column F. In columns  
1097 H-I, the arrows represent identified sites of cleavage (ND: none detected) and cleaved peptide  
1098 products that are bolded and underlined were uniquely detected in the enzyme-treated samples  
1099 compared to the analysis of the bare synthetic peptide.

1100 **Supplemental Table S2:** Predicted TOPs cleavage substrates including their DAP median |LFC|  
1101 and the corresponding timepoint.

1102 **Supplemental Table S3:** Scoring of previously found bioactive peptides with the Markov-Chain  
1103 model.

1104 **Supplemental Table S4:** Predicted bioactive peptides with significantly high Z-scores and  
1105 differential abundance between *top1top2* and WT in the peptidome.

1106 **Supplemental Table S5:** Intersection between predicted bioactive peptides and predicted TOP  
1107 cleavage substrates.



- 1108 **Supplemental Table S6:** Set of peptides selected for bioactivity screening.
- 1109 **Supplemental Table S7:** Colony-forming units (CFU) (logarithmic scale) measured at 0 dpi and  
1110 3 dpi and normalized for plant weight to assess the impact of peptide treatments on plant  
1111 response to PstAvrRpt2.
- 1112 **Supplemental Data Set S1:** Quantified peptide abundances from LC-MS/MS data analysis.  
1113 Quantified peptide abundances for Col-0 replicates are found in columns AK-AS. Quantified  
1114 peptide abundances for *top1top2* replicates are found in columns AT-BB.
- 1115 **Supplemental Data Set S2:** Statistical decision - genotype comparison.
- 1116 **Supplemental Data Set S3:** Statistical decision - time series analysis.
- 1117 **Supplemental Data Set S4:** GO enrichment analysis.
- 1118 **Supplemental Data Set S5:** TOPs cleavage prediction results.

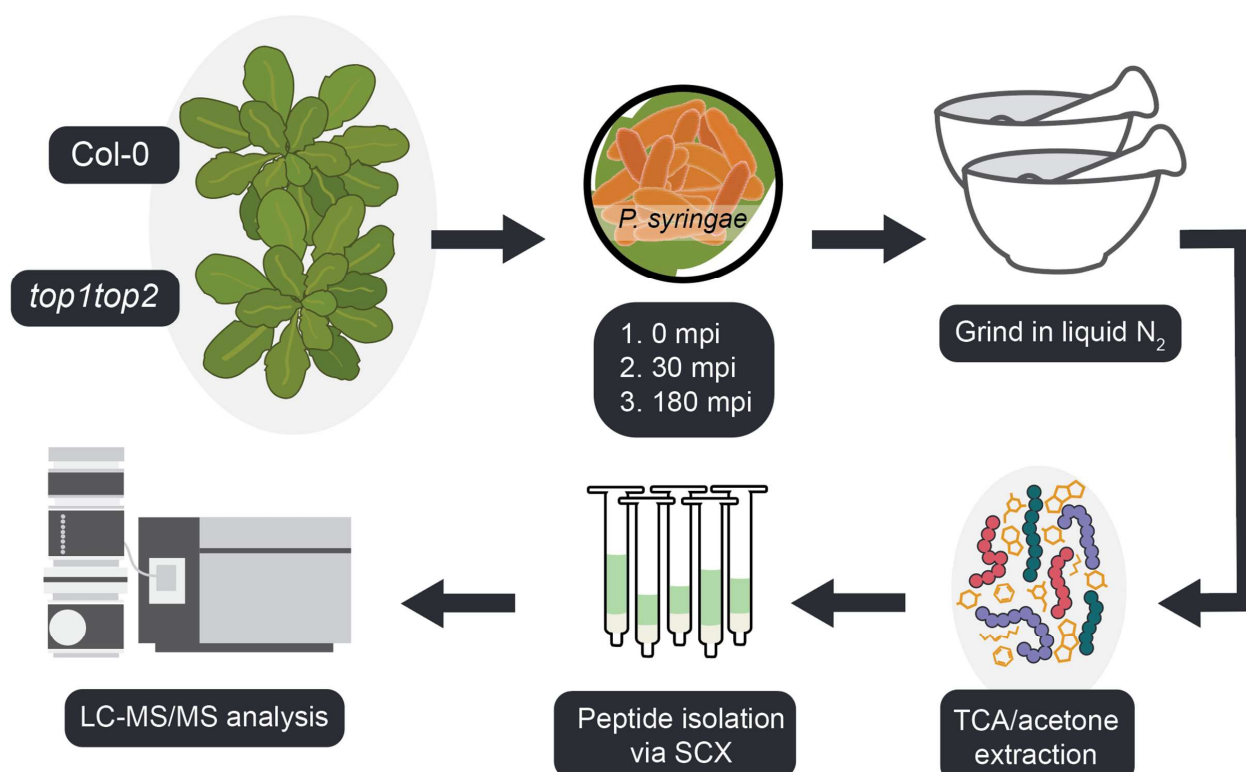

Figure 1: The peptidomes of WT and *top1top2* rosette leaves were analyzed following pathogen inoculation with *Pst* avrRpt2 to measure peptidome changes during the initial stages of ETI and elucidate TOP-mediated proteolytic pathways during plant defense. Rosette leaves were ground under liquid nitrogen before extracting peptides with 10% TCA in acetone. Peptides were isolated from small molecules with SCX SPE before peptide quantitation. Peptide concentrations across replicates were quantified and normalized before liquid chromatography-tandem mass spectrometry (LC-MS/MS) analysis.

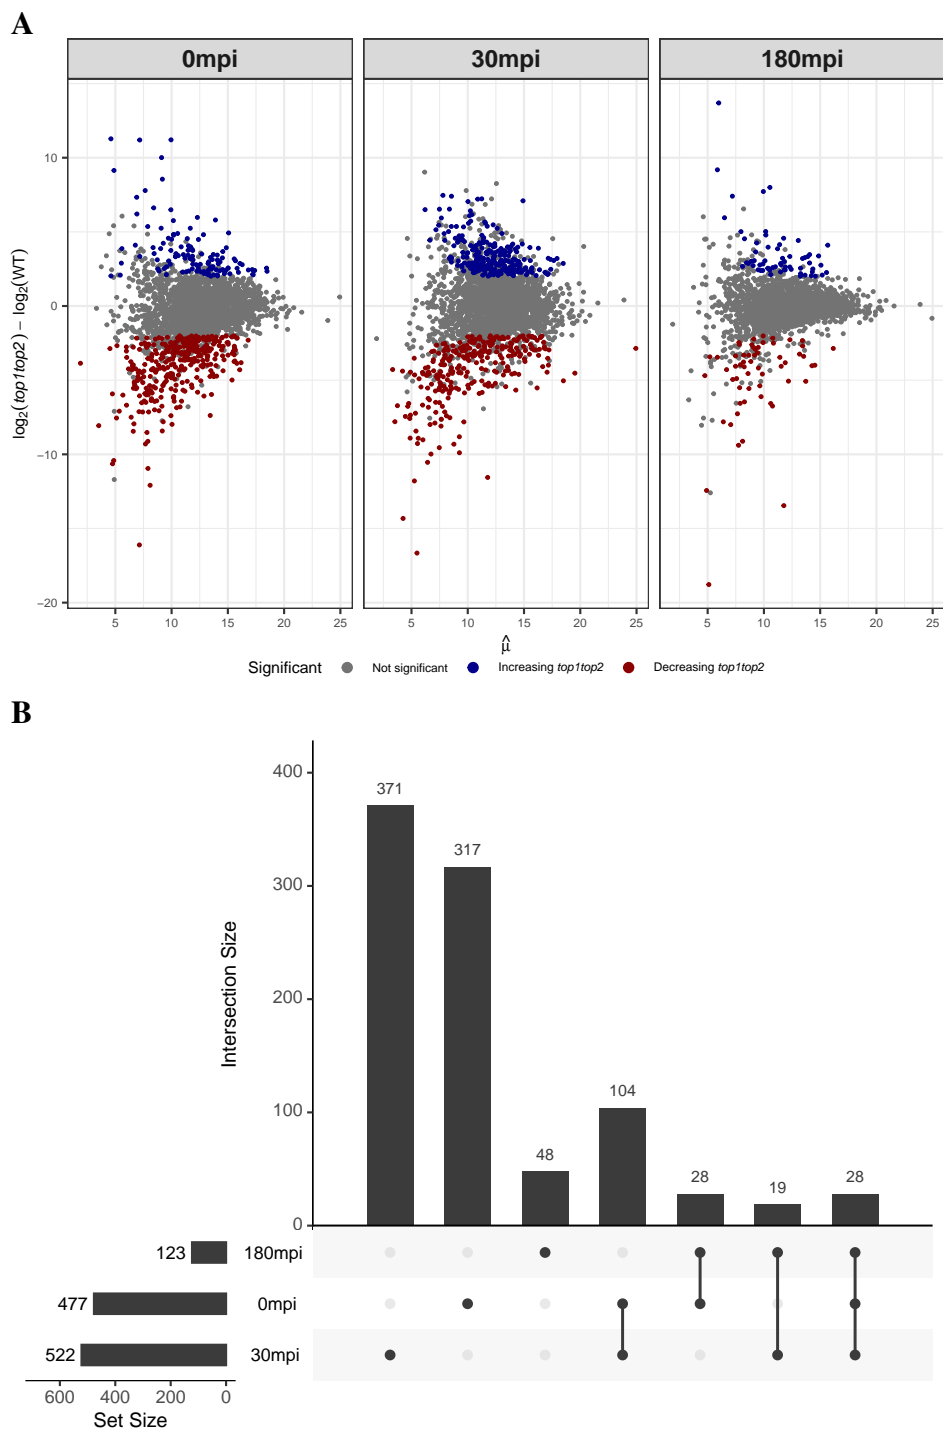

Figure 2: The distribution of the decision of the differential abundance analysis for the peptides. (A) shows a MA-plot with the title of each facet corresponding to the decision of that comparison. Each dot corresponds to a peptide, and the x-axis shows the mean of that peptide for that comparison, while the y-axis shows the log fold-change, and a positive value indicates accumulation in *top1top2*. Peptides that were imputed were represented with their median mean and fold change from all imputations. (B) UpSetR analysis of the significant hits. The figure shows the size of the set(s) marked with a dot below the bars.

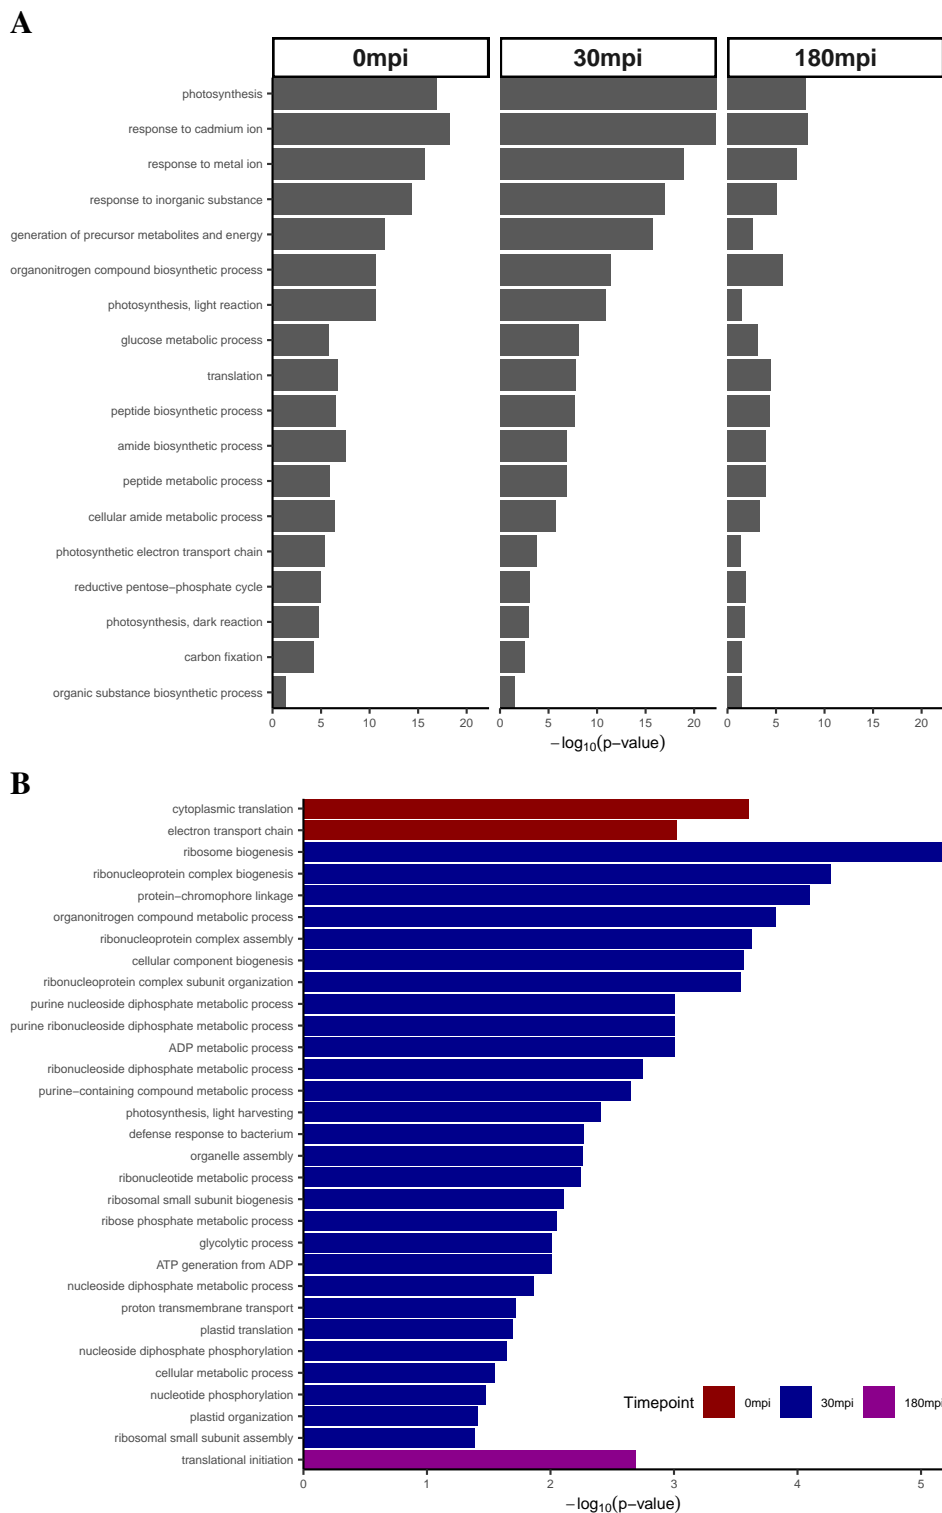

Figure 3: GO-enrichment of the differentially abundant peptides at the different time points. The x-axis shows the category, and the y-axis shows the  $-\log_{10}(\text{p-value})$  of the statistical test for over-representation. (A) shows common GO terms enriched in all time points with the title of the facets indicating the time point. (B) shows the GO terms unique to different time points. GO-enrichment of biological process unique to 0 mpi and 30 mpi for the significant proteins. Red color indicates the GO-terms unique to 0 mpi, and blue indicates the same but for 30 mpi.

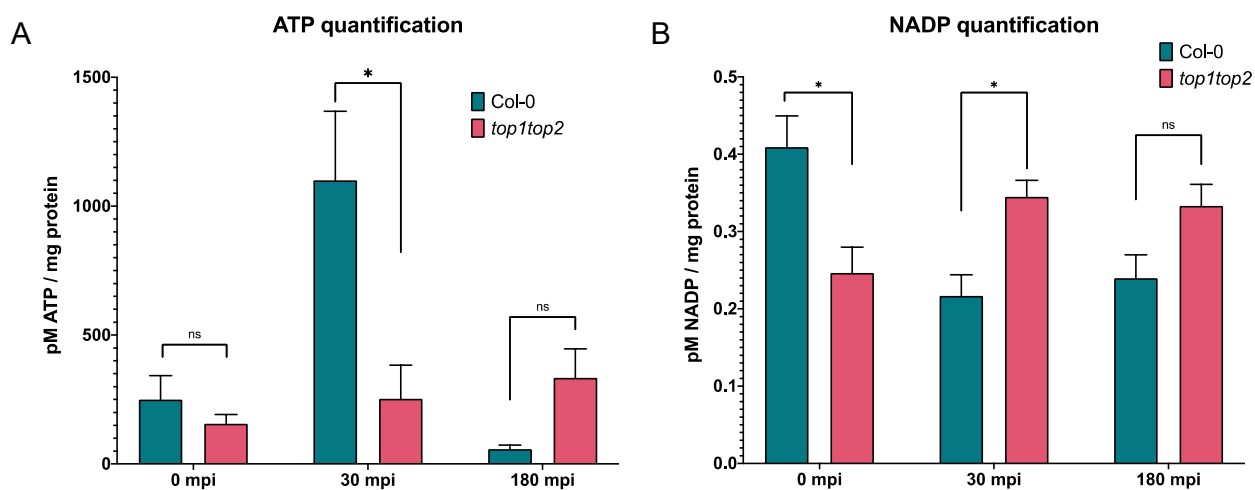

Figure 4: The metabolic state of Arabidopsis WT and *top1top2* plant lines following inoculation with *Pst avrRpt2*. (A) ATP was quantified using a luciferase assay (\*:  $p < 0.05$ , ns: not significant, following two-sample equal variance t-test). (B) NADP<sup>+</sup> and NADPH were quantified using an enzyme cycling assay (\*:  $p < 0.05$ , ns: not significant, following two-sample equal variance t-test).

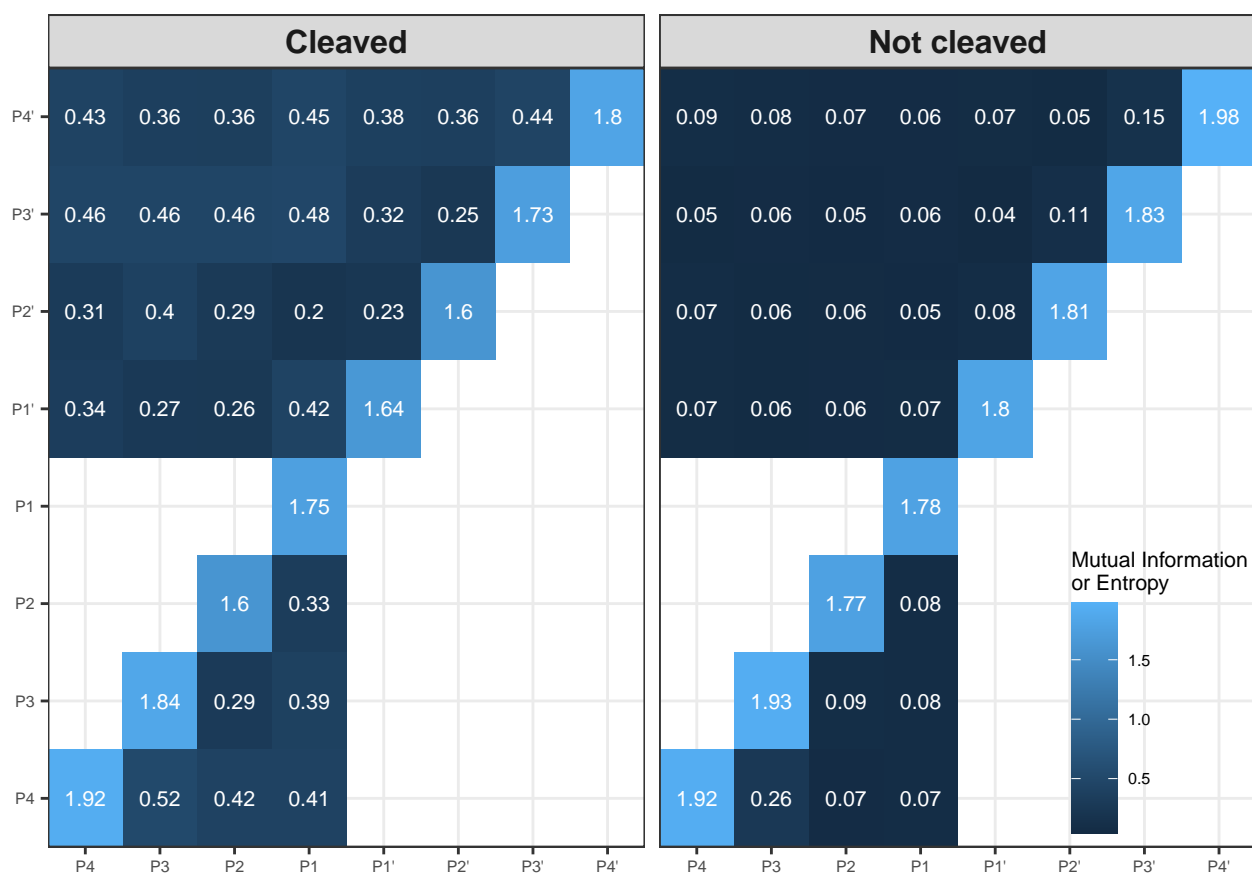

Figure 5: Comparison of the information of the amino acid properties around the validated cleavage sites and for a sliding window of size six for the amino acid properties in the peptides not cleaved as well as the negative examples. The x- and y- axes show the different positions around either the cleavage sites or the sliding window. The diagonal shows the entropy values, and the remaining cell show the mutual information between the positions.

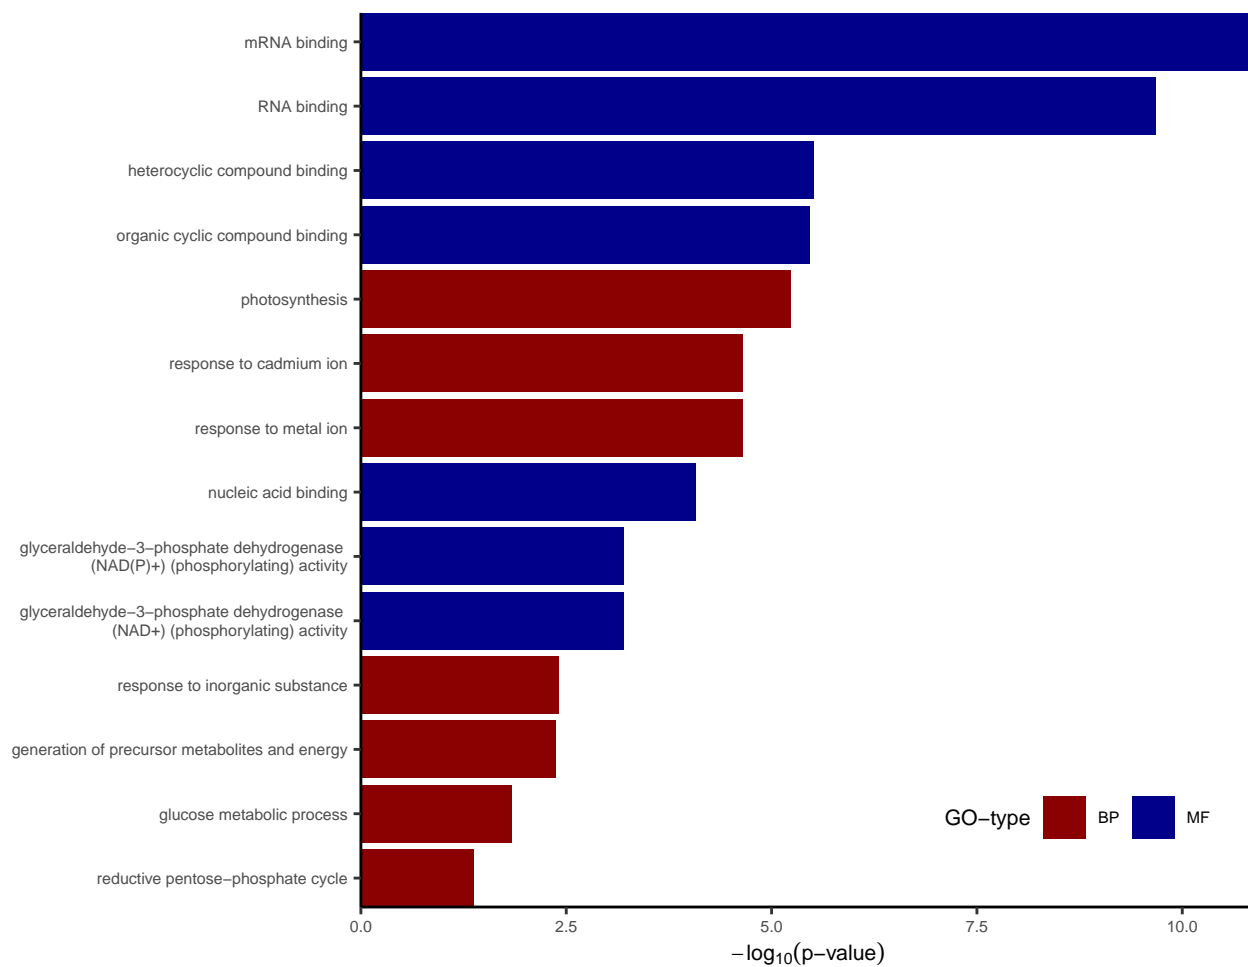

Figure 6: Shows the GO-enrichment of the proteins with peptides that had predicted cleavage sites that coincided with their fold-change. The labels correspond to the GO-term; red labels show biological processes while blue shows molecular function. The x-axis indicates the number of genes in the category, and the y-axis shows the  $-\log_{10}(\text{p-value})$  of the statistical test for overrepresentation.



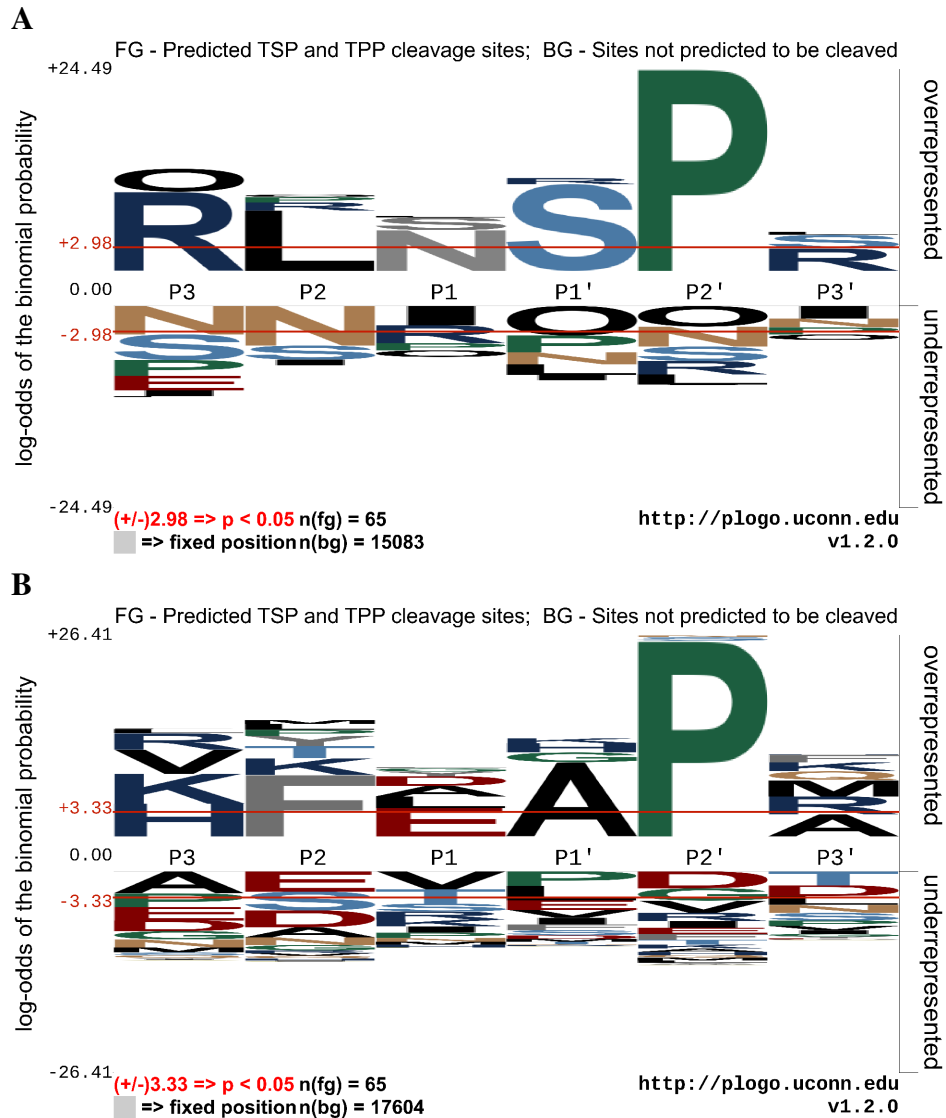

Figure 7: Shows the GO-enrichment of the proteins with peptides that had predicted cleavage sites that coincided with their fold-change. The labels correspond to the GO-term; red labels show biological processes while blue shows molecular function. The x-axis indicates the number of genes in the category, and the y-axis shows the  $-\log_{10}(\text{p-value})$  of the statistical test for overrepresentation.

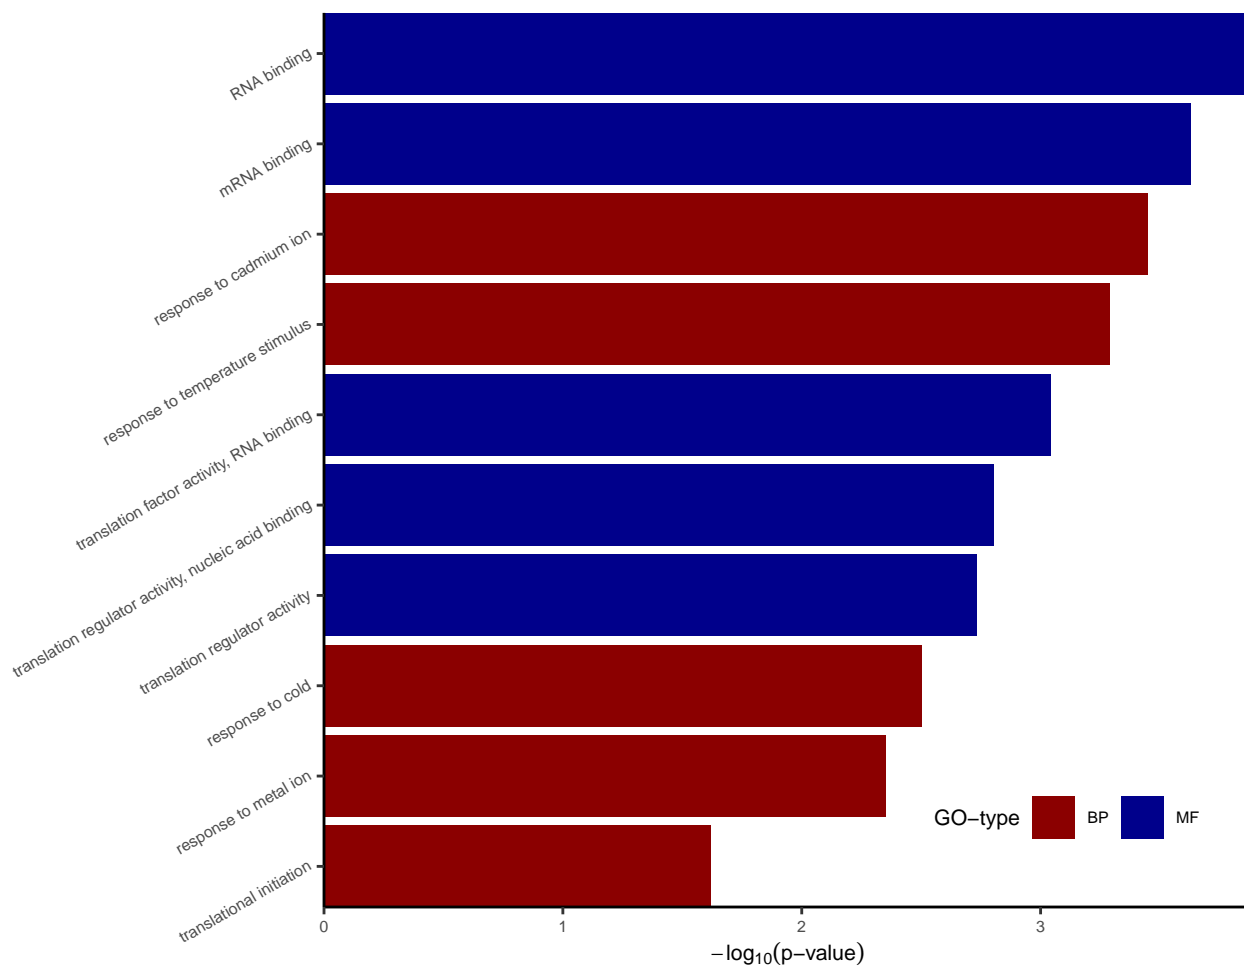

Figure 8: GO-enrichment of predicted signaling peptides differentially expressed between WT and *top1top2*. The labels correspond to the GO-term; red labels show biological processes while blue shows molecular function. The x-axis indicates the number of genes in the category, and the y-axis shows the  $-\log_{10}(\text{p-value})$  of the statistical test for overrepresentation.

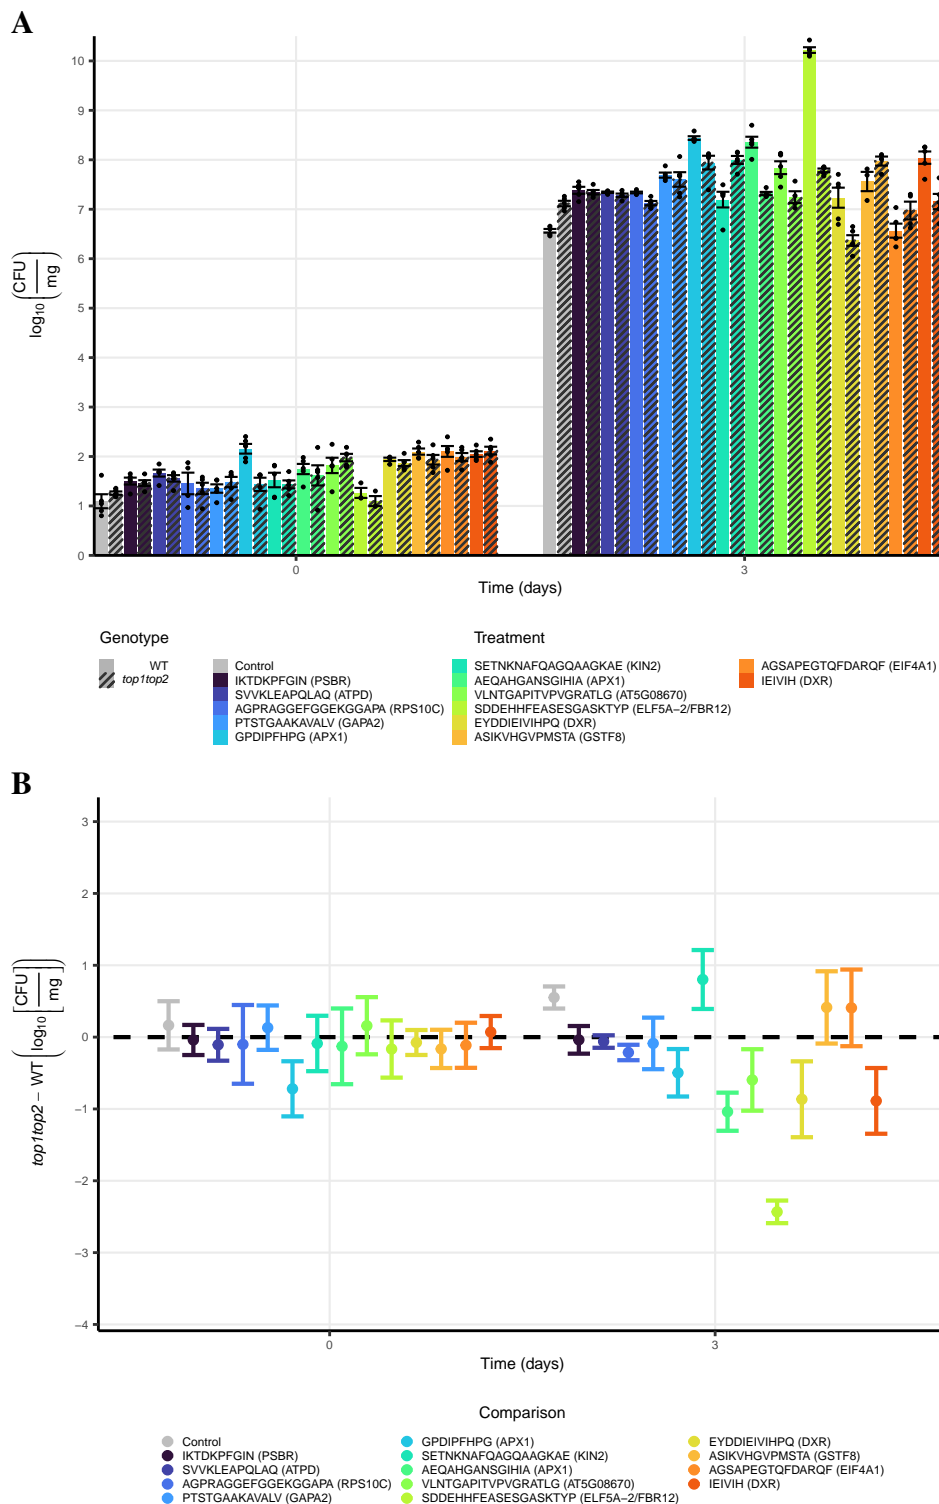

Figure 9: Peptide treatment causes perturbations in bacterial CFU during ETI. Colors indicate the peptide treatment: control or peptide sequence (with the corresponding protein in parenthesis) for plants grown without/with peptide treatment. The x-axis shows the measurement time. The y-axis in (A) shows the mean value of five replicates in  $\log_{10}(\text{CFU}/\text{mg})$ ; error bars correspond to one standard error of the mean, and each black dot indicates one measurement. (B) shows the distribution of the test statistic between *top1top2* and WT. The y-axis shows the difference in mean between the genotypes with a 95% confidence interval inferred from an equal variance t-test. The dashed line marks the null hypothesis of the test statistic. A confidence interval without overlap with the null hypothesis is significant at the 0.05 significance level.

## Parsed Citations

- Al-Mohanna, T., Nejat, N., Iannetta, A.A., Hicks, L.M., Popescu, G. V, and Popescu, S.C. (2021). Arabidopsis thimet oligopeptidases are redox-sensitive enzymes active in the local and systemic plant immune response. J. Biol. Chem: 100695.**  
Google Scholar: [Author Only](#) [Title Only](#) [Author and Title](#)
- Anders, S. and Huber, W. (2010). Differential expression analysis for sequence count data. Nat. Preced.: 1.**  
Google Scholar: [Author Only](#) [Title Only](#) [Author and Title](#)
- Axtell, M.J. and Staskawicz, B.J. (2003). Initiation of RPS2-specified disease resistance in Arabidopsis is coupled to the AvrRpt2-directed elimination of RIN4. Cell 112: 369–377.**  
Google Scholar: [Author Only](#) [Title Only](#) [Author and Title](#)
- Bassham, D.C. (2007). Plant autophagy-more than a starvation response. Curr. Opin. Plant Biol. 10: 587–593.**  
Google Scholar: [Author Only](#) [Title Only](#) [Author and Title](#)
- Berg, P., McConnell, E.W., Hicks, L.M., Popescu, S.C., and Popescu, G. V (2019). Evaluation of linear models and missing value imputation for the analysis of peptide-centric proteomics. BMC Bioinformatics 20: 7–16.**  
Google Scholar: [Author Only](#) [Title Only](#) [Author and Title](#)
- Berti, D.A., Morano, C., Russo, L.C., Castro, L.M., Cunha, F.M., Zhang, X., Sironi, J., Klitzke, C.F., Ferro, E.S., and Fricker, L.D. (2009). Analysis of intracellular substrates and products of thimet oligopeptidase in human embryonic kidney 293 cells. J. Biol. Chem. 284: 14105–14116.**  
Google Scholar: [Author Only](#) [Title Only](#) [Author and Title](#)
- Carretero-Paulet, L., Ahumada, I., Cunillera, N., Rodriguez-Concepción, M., Ferrer, A., Boronat, A., and Campos, N. (2002). Expression and molecular analysis of the Arabidopsis DXR gene encoding 1-deoxy-D-xylulose 5-phosphate reductoisomerase, the first committed enzyme of the 2-C-methyl-D-erythritol 4-phosphate pathway. Plant Physiol. 129: 1581–1591.**  
Google Scholar: [Author Only](#) [Title Only](#) [Author and Title](#)
- Cavalcanti, D.M.L.P. et al. (2014). Neurolysin knockout mice generation and initial phenotype characterization. J. Biol. Chem. 289: 15426–15440.**  
Google Scholar: [Author Only](#) [Title Only](#) [Author and Title](#)
- Chagas, F.O., Pessotti, R.D.C., Caraballo-Rodríguez, A.M., and Pupo, M.T. (2018). Chemical signaling involved in plant-microbe interactions. Chem. Soc. Rev. 47: 1652–1704.**  
Google Scholar: [Author Only](#) [Title Only](#) [Author and Title](#)
- Chen, Y., Fan, K., Hung, S., and Chen, Y. (2020). The role of peptides cleaved from protein precursors in eliciting plant stress reactions. New Phytol. 225: 2267–2282.**  
Google Scholar: [Author Only](#) [Title Only](#) [Author and Title](#)
- Cheng, C., Krishnakumar, V., Chan, A.P., Thibaud-Nissen, F., Schobel, S., and Town, C.D. (2017). Araport11: a complete reannotation of the Arabidopsis thaliana reference genome. Plant J. 89: 789–804.**  
Google Scholar: [Author Only](#) [Title Only](#) [Author and Title](#)
- Cheng, Z., Li, J.-F., Niu, Y., Zhang, X.-C., Woody, O.Z., Xiong, Y., Djonović, S., Millet, Y., Bush, J., and McConkey, B.J. (2015). Pathogen-secreted proteases activate a novel plant immune pathway. Nature 521: 213–216.**  
Google Scholar: [Author Only](#) [Title Only](#) [Author and Title](#)
- Chinchilla, D., Zipfel, C., Robatzek, S., Kemmerling, B., Nürnberger, T., Jones, J.D.G., Felix, G., and Boller, T. (2007). A flagellin-induced complex of the receptor FLS2 and BAK1 initiates plant defence. Nature 448: 497–500.**  
Google Scholar: [Author Only](#) [Title Only](#) [Author and Title](#)
- Choi, J., Tanaka, K., Cao, Y., Qi, Y., Qiu, J., Liang, Y., Lee, S.Y., and Stacey, G. (2014). Identification of a plant receptor for extracellular ATP. Science (80-. ). 343: 290–294.**  
Google Scholar: [Author Only](#) [Title Only](#) [Author and Title](#)
- Conway, J.R., Lex, A., and Gehlenborg, N. (2017). UpSetR: an R package for the visualization of intersecting sets and their properties. Bioinformatics.**  
Google Scholar: [Author Only](#) [Title Only](#) [Author and Title](#)
- Cui, H., Tsuda, K., and Parker, J.E. (2015). Effector-triggered immunity: From pathogen perception to robust defense. Annu. Rev. Plant Biol. 66: 487–511.**  
Google Scholar: [Author Only](#) [Title Only](#) [Author and Title](#)
- Das, K. and Roychoudhury, A. (2014). Reactive oxygen species (ROS) and response of antioxidants as ROS-scavengers during environmental stress in plants. Front. Environ. Sci. 2: 53.**  
Google Scholar: [Author Only](#) [Title Only](#) [Author and Title](#)

Díaz-Villanueva, J.F., Díaz-Molina, R., and García-González, V. (2015). Protein folding and mechanisms of proteostasis. *Int. J. Mol. Sci.* 16: 17193–17230.

Google Scholar: [Author Only](#) [Title Only](#) [Author and Title](#)

duVerle, D.A and Mamitsuka, H. (2012). A review of statistical methods for prediction of proteolytic cleavage. *Brief. Bioinform.* 13: 337–349.

Google Scholar: [Author Only](#) [Title Only](#) [Author and Title](#)

Feng, H., Chen, Q., Feng, J., Zhang, J., Yang, X., and Zuo, J. (2007). Functional characterization of the Arabidopsis eukaryotic translation initiation factor 5A-2 that plays a crucial role in plant growth and development by regulating cell division, cell growth, and cell death. *Plant Physiol.* 144: 1531–1545.

Google Scholar: [Author Only](#) [Title Only](#) [Author and Title](#)

Ferro, E.S., Gewehr, M.C.F., and Navon, A. (2020). Thimet oligopeptidase biochemical and biological significances: past, present, and future directions. *Biomolecules* 10: 1229.

Google Scholar: [Author Only](#) [Title Only](#) [Author and Title](#)

Ferro, E.S., Rioli, V., Castro, L.M., and Fricker, L.D. (2014). Intracellular peptides: From discovery to function. *EuPA Open Proteomics* 3: 143–151.

Google Scholar: [Author Only](#) [Title Only](#) [Author and Title](#)

Fürst, R., Brueckl, C., Kuebler, W.M., Zahler, S., Krötz, F., Görlach, A., Vollmar, A.M., and Kiemer, A.K. (2005). Atrial natriuretic peptide induces mitogen-activated protein kinase phosphatase-1 in human endothelial cells via Rac1 and NAD (P) H oxidase/Nox2-activation. *Circ. Res.* 96: 43–53.

Google Scholar: [Author Only](#) [Title Only](#) [Author and Title](#)

Gomis-Rüth, F.X. (2009). Catalytic domain architecture of metzincin metalloproteases. *J. Biol. Chem.* 284: 15353–15357.

Google Scholar: [Author Only](#) [Title Only](#) [Author and Title](#)

Hashida, S. and Kawai-Yamada, M. (2019). Inter-organelle NAD metabolism underpinning light responsive NADP dynamics in plants. *Front. Plant Sci.* 10: 960.

Google Scholar: [Author Only](#) [Title Only](#) [Author and Title](#)

Heath, M.C. (2000). Hypersensitive response-related death. In *Programmed Cell Death in Higher Plants* (Springer Netherlands), pp. 77–90.

Google Scholar: [Author Only](#) [Title Only](#) [Author and Title](#)

Henry, E., Fung, N., Liu, J., Drakakaki, G., and Coaker, G. (2015). Beyond glycolysis: GAPDHs are multi-functional enzymes involved in regulation of ROS, autophagy, and plant immune responses. *PLoS Genet.* 11: e1005199.

Google Scholar: [Author Only](#) [Title Only](#) [Author and Title](#)

Van der Hoorn, R.A.L. (2008). Plant proteases: from phenotypes to molecular mechanisms. *Annu. Rev. Plant Biol.* 59: 191–223.

Google Scholar: [Author Only](#) [Title Only](#) [Author and Title](#)

Van der Hoorn, R.A.L. and Klemenčič, M. (2021). Plant proteases: From molecular mechanisms to functions in development and immunity. *J. Exp. Bot.* 72: 3337–3339.

Google Scholar: [Author Only](#) [Title Only](#) [Author and Title](#)

Hopkins, M.T., Lampi, Y., Wang, T.-W., Liu, Z., and Thompson, J.E. (2008). Eukaryotic translation initiation factor 5A is involved in pathogen-induced cell death and development of disease symptoms in Arabidopsis. *Plant Physiol.* 148: 479–489.

Google Scholar: [Author Only](#) [Title Only](#) [Author and Title](#)

Hou, S., Liu, D., and He, P. (2021). Phyto cytokines function as immunological modulators of plant immunity. *Stress Biol.* 1: 1–14.

Google Scholar: [Author Only](#) [Title Only](#) [Author and Title](#)

Iannetta, A.A., Rogers, H.T., Al-Mohanna, T., O'Brien, J.N., Wommack, A.J., Popescu, S.C., and Hicks, L.M. (2021). Profiling thimet oligopeptidase-mediated proteolysis in Arabidopsis thaliana. *Plant J.*: tpj.15165.

Google Scholar: [Author Only](#) [Title Only](#) [Author and Title](#)

Ishiga, Y., Ishiga, T., Ichinose, Y., and Mysore, K.S. (2017). Pseudomonas syringae flood-inoculation method in Arabidopsis. *Bio-protocol* 7: e2106–e2106.

Google Scholar: [Author Only](#) [Title Only](#) [Author and Title](#)

Ishiga, Y., Ishiga, T., Uppalapati, S.R., and Mysore, K.S. (2011). Arabidopsis seedling flood-inoculation technique: a rapid and reliable assay for studying plant-bacterial interactions. *Plant Methods* 7: 1–12.

Google Scholar: [Author Only](#) [Title Only](#) [Author and Title](#)

Jones, J.D.G. and Dangl, J.L. (2006). The plant immune system. *Nature* 444: 323–329.

Google Scholar: [Author Only](#) [Title Only](#) [Author and Title](#)

Käll, L., Canterbury, J.D., Weston, J., Noble, W.S., and MacCoss, M.J. (2007). Semi-supervised learning for peptide identification

from shotgun proteomics datasets. *Nat. Methods* 4: 923–925.

Google Scholar: [Author Only](#) [Title Only](#) [Author and Title](#)

Karatzoglou, A., Smola, A., Hornik, K., and Zeileis, A. (2004). kernlab—an S4 package for kernel methods in R. *J. Stat. Softw.* 11: 1–20.

Google Scholar: [Author Only](#) [Title Only](#) [Author and Title](#)

Kessler, J.H. et al. (2011). Antigen processing by nardilysin and thimet oligopeptidase generates cytotoxic T cell epitopes. *Nat. Immunol.* 12: 45–53.

Google Scholar: [Author Only](#) [Title Only](#) [Author and Title](#)

Kidrič, M., Kos, J., and Sabotič, J. (2014). Proteases and their endogenous inhibitors in the plant response to abiotic stress. *Rev. Art. Sci.* 38.

Google Scholar: [Author Only](#) [Title Only](#) [Author and Title](#)

Kirkpatrick, C.L. et al. (2017). The "PepSAM-MS" Pipeline for Natural Product Bioactive Peptide Discovery. *Anal. Chem.* 89: 1194–1201.

Google Scholar: [Author Only](#) [Title Only](#) [Author and Title](#)

Kmiec, B., Teixeira, P.F., Berntsson, R.P.-A., Murcha, M.W., Branca, R.M.M., Radomiljac, J.D., Regberg, J., Svensson, L.M., Bakali, A., and Langel, Ü. (2013). Organellar oligopeptidase (OOP) provides a complementary pathway for targeting peptide degradation in mitochondria and chloroplasts. *Proc. Natl. Acad. Sci.* 110: E3761–E3769.

Google Scholar: [Author Only](#) [Title Only](#) [Author and Title](#)

Kmiec, B., Teixeira, P.F., Murcha, M.W., and Glaser, E. (2016). Divergent evolution of the M3A family of metallopeptidases in plants. *Physiol. Plant.* 157: 380–388.

Google Scholar: [Author Only](#) [Title Only](#) [Author and Title](#)

Krishnakumar, V., Contrino, S., Cheng, C.-Y., Belyaeva, I., Ferlanti, E.S., Miller, J.R., Vaughn, M.W., Micklem, G., Town, C.D., and Chan, A.P. (2017). ThaleMine: a warehouse for Arabidopsis data integration and discovery. *Plant Cell Physiol.* 58: e4–e4.

Google Scholar: [Author Only](#) [Title Only](#) [Author and Title](#)

Lam, E., Kato, N., and Lawton, M. (2001). Programmed cell death, mitochondria and the plant hypersensitive response. *Nature* 411: 848–853.

Google Scholar: [Author Only](#) [Title Only](#) [Author and Title](#)

Lamb, C. and Dixon, R.A. (1997). The oxidative burst in plant disease resistance. *Annu. Rev. Plant Biol.* 48: 251–275.

Google Scholar: [Author Only](#) [Title Only](#) [Author and Title](#)

Law, C.W., Chen, Y., Shi, W., and Smyth, G.K. (2014). voom: Precision weights unlock linear model analysis tools for RNA-seq read counts. *Genome Biol.* 15: R29.

Google Scholar: [Author Only](#) [Title Only](#) [Author and Title](#)

Lim, E.J., Sampath, S., Coll-Rodriguez, J., Schmidt, J., Ray, K., and Rodgers, D.W. (2007). Swapping the substrate specificities of the neuropeptidases neurolysin and thimet oligopeptidase. *J. Biol. Chem.* 282: 9722–9732.

Google Scholar: [Author Only](#) [Title Only](#) [Author and Title](#)

Lim, H., Cho, M.-H., Jeon, J.-S., Bhoo, S.H., Kwon, Y.-K., and Hahn, T.-R. (2009). Altered expression of pyrophosphate: fructose-6-phosphate 1-phosphotransferase affects the growth of transgenic Arabidopsis plants. *Mol. Cells* 27: 641–649.

Google Scholar: [Author Only](#) [Title Only](#) [Author and Title](#)

Lindsey III, B.E., Rivero, L., Calhoun, C.S., Grotewold, E., and Brkljacic, J. (2017). Standardized method for high-throughput sterilization of Arabidopsis seeds. *JoVE (Journal Vis. Exp.):* e56587.

Google Scholar: [Author Only](#) [Title Only](#) [Author and Title](#)

Lone, A.M., Kim, Y.G., and Saghatelian, A. (2013). Peptidomics methods for the identification of peptidase-substrate interactions. *Curr. Opin. Chem. Biol.* 17: 83–89.

Google Scholar: [Author Only](#) [Title Only](#) [Author and Title](#)

McConnell, E.W., Berg, P., Westlake, T.J., Wilson, K.M., Popescu, G. V, Hicks, L.M., and Popescu, S.C. (2019). Proteome-wide analysis of cysteine reactivity during effector-triggered immunity. *Plant Physiol.* 179: 1248–1264.

Google Scholar: [Author Only](#) [Title Only](#) [Author and Title](#)

Mhamdi, A., Mauve, C., Gouia, H., Saindrenan, P., Hodges, M., and Noctor, G. (2010). Cytosolic NADP-dependent isocitrate dehydrogenase contributes to redox homeostasis and the regulation of pathogen responses in Arabidopsis leaves. *Plant. Cell Environ.* 33: 1112–1123.

Google Scholar: [Author Only](#) [Title Only](#) [Author and Title](#)

Mijalis, A.J., Thomas, D.A., Simon, M.D., Adamo, A., Beaumont, R., Jensen, K.F., and Pentelute, B.L. (2017). A fully automated flow-based approach for accelerated peptide synthesis. *Nat. Chem. Biol.* 13: 464–466.



Google Scholar: [Author Only](#) [Title Only](#) [Author and Title](#)

**Mooney, C., Haslam, N.J., Holton, T.A., Pollastri, G., and Shields, D.C. (2013). PeptideLocator: prediction of bioactive peptides in protein sequences. *Bioinformatics* 29: 1120–1126.**

Google Scholar: [Author Only](#) [Title Only](#) [Author and Title](#)

**Mooney, C., Haslam, N.J., Pollastri, G., and Shields, D.C. (2012). Towards the improved discovery and design of functional peptides: common features of diverse classes permit generalized prediction of bioactivity.**

**Moreau, M., Westlake, T., Zampogna, G., Popescu, G., Tian, M., Noutsos, C., and Popescu, S. (2013). The Arabidopsis oligopeptidases TOP1 and TOP2 are salicylic acid targets that modulate SA-mediated signaling and the immune response. *Plant J.***

Google Scholar: [Author Only](#) [Title Only](#) [Author and Title](#)

**Nardo, A.E., Añón, M.C., and Parisi, G. (2018). Large-scale mapping of bioactive peptides in structural and sequence space. *PLoS One* 13: e0191063.**

Google Scholar: [Author Only](#) [Title Only](#) [Author and Title](#)

**Nelder, J.A. and Wedderburn, R.W.M. (1972). Generalized linear models. *J. R. Stat. Soc. Ser. A* 135: 370–384.**

Google Scholar: [Author Only](#) [Title Only](#) [Author and Title](#)

**O'Shea, J.P., Chou, M.F., Quader, S.A., Ryan, J.K., Church, G.M., and Schwartz, D. (2013). PLogo: A probabilistic approach to visualizing sequence motifs. *Nat. Methods* 10: 1211–1212.**

Google Scholar: [Author Only](#) [Title Only](#) [Author and Title](#)

**Oliveira, V., Campos, M., Melo, R.L., Ferro, E.S., Camargo, A.C.M., Juliano, M.A., and Juliano, L. (2001). Substrate specificity characterization of recombinant metallo oligo-peptidases thimet oligopeptidase and neurolysin. *Biochemistry* 40: 4417–4425.**

Google Scholar: [Author Only](#) [Title Only](#) [Author and Title](#)

**Onicescu, O. (1977). Probabilități și procese aleatoare (Ed. Științifică și Enciclopedică).**

Google Scholar: [Author Only](#) [Title Only](#) [Author and Title](#)

**Paulus, J.K. and Van der Hoorn, R.A.L. (2019). Do proteolytic cascades exist in plants? *J. Exp. Bot.* 70: 1997–2002.**

Google Scholar: [Author Only](#) [Title Only](#) [Author and Title](#)

**Paulus, J.K., Kourelis, J., Ramasubramanian, S., Homma, F., Godson, A., Hörger, A.C., Hong, T.N., Krahn, D., Carballo, L.O., and Wang, S. (2020). Extracellular proteolytic cascade in tomato activates immune protease Rcr3. *Proc. Natl. Acad. Sci.* 117: 17409–17417.**

Google Scholar: [Author Only](#) [Title Only](#) [Author and Title](#)

**Perez-Riverol, Y. et al. (2019). The PRIDE database and related tools and resources in 2019: improving support for quantification data. *Nucleic Acids Res.* 47: D442–D450.**

Google Scholar: [Author Only](#) [Title Only](#) [Author and Title](#)

**Polge, C., Jaquinod, M., Holzer, F., Bourguignon, J., Walling, L., and Brouquisse, R. (2009). Evidence for the existence in *Arabidopsis thaliana* of the proteasome proteolytic pathway activation in response to cadmium. *J. Biol. Chem.* 284: 35412–35424.**

Google Scholar: [Author Only](#) [Title Only](#) [Author and Title](#)

**Qi, D., Dubiella, U., Kim, S.H., Sloss, D.I., Downen, R.H., Dixon, J.E., and Innes, R.W. (2014). Recognition of the protein kinase AVRPPHB SUSCEPTIBLE1 by the disease resistance protein RESISTANCE TO PSEUDOMONAS SYRINGAE5 is dependent on s-acylation and an exposed loop in AVRPPHB SUSCEPTIBLE1. *Plant Physiol.* 164: 340–351.**

Google Scholar: [Author Only](#) [Title Only](#) [Author and Title](#)

**Rawlings, N.D. (2016). Peptidase specificity from the substrate cleavage collection in the MEROPS database and a tool to measure cleavage site conservation. *Biochimie* 122: 5–30.**

Google Scholar: [Author Only](#) [Title Only](#) [Author and Title](#)

**Rawlings, N.D., Barrett, A.J., Thomas, P.D., Huang, X., Bateman, A., and Finn, R.D. (2018). The MEROPS database of proteolytic enzymes, their substrates and inhibitors in 2017 and a comparison with peptidases in the PANTHER database. *Nucleic Acids Res.* 46: D624–D632.**

Google Scholar: [Author Only](#) [Title Only](#) [Author and Title](#)

**Rawlings, N.D. and Salvesen, G. (2013). Handbook of proteolytic enzymes (Academic press).**

**Rei Liao, J.Y. and van Wijk, K.J. (2019). Discovery of AAA+ Protease Substrates through Trapping Approaches. *Trends Biochem. Sci.* 44: 528–545.**

Google Scholar: [Author Only](#) [Title Only](#) [Author and Title](#)

**Ritchie, M.E., Phipson, B., Wu, D.I., Hu, Y., Law, C.W., Shi, W., and Smyth, G.K. (2015). limma powers differential expression analyses for RNA-sequencing and microarray studies. *Nucleic Acids Res.* 43: e47–e47.**

Google Scholar: [Author Only](#) [Title Only](#) [Author and Title](#)



**Samant, R.S., Livingston, C.M., Sontag, E.M., and Frydman, J. (2018). Distinct proteostasis circuits cooperate in nuclear and cytoplasmic protein quality control. *Nature* 563: 407–411.**

Google Scholar: [Author Only](#) [Title Only](#) [Author and Title](#)

**Schmal, C., Reimann, P., and Staiger, D. (2013). A circadian clock-regulated toggle switch explains AtGRP7 and AtGRP8 oscillations in *Arabidopsis thaliana*. *PLoS Comput. Biol.* 9: e1002986.**

Google Scholar: [Author Only](#) [Title Only](#) [Author and Title](#)

**Segonzac, C. and Monaghan, J. (2019). Modulation of plant innate immune signaling by small peptides. *Curr. Opin. Plant Biol.* 51: 22–28.**

Google Scholar: [Author Only](#) [Title Only](#) [Author and Title](#)

**Shao, F., Golstein, C., Ade, J., Stoutemyer, M., Dixon, J.E., and Innes, R.W. (2003). Cleavage of *Arabidopsis* PBS1 by a bacterial type III effector. *Science* (80-. ). 301: 1230–1233.**

Google Scholar: [Author Only](#) [Title Only](#) [Author and Title](#)

**Simon, M.D., Heider, P.L., Adamo, A., Vinogradov, A.A., Mong, S.K., Li, X., Berger, T., Policarpo, R.L., Zhang, C., and Zou, Y. (2014). Rapid flow-based peptide synthesis. *ChemBioChem* 15: 713–720.**

Google Scholar: [Author Only](#) [Title Only](#) [Author and Title](#)

**Stegmann, M., Monaghan, J., Smakowska-Luzan, E., Rovenich, H., Lehner, A., Holton, N., Belkhadir, Y., and Zipfel, C. (2017). The receptor kinase FER is a RALF-regulated scaffold controlling plant immune signaling. *Science* (80-. ). 355: 287–289.**

Google Scholar: [Author Only](#) [Title Only](#) [Author and Title](#)

**Suhm, T., Kaimal, J.M., Dawitz, H., Peselj, C., Masser, A.E., Hanzén, S., Ambrožič, M., Smialowska, A., Björck, M.L., and Brzezinski, P. (2018). Mitochondrial translation efficiency controls cytoplasmic protein homeostasis. *Cell Metab.* 27: 1309–1322.**

Google Scholar: [Author Only](#) [Title Only](#) [Author and Title](#)

**Suykens, J.A.K. and Vandewalle, J. (1999). Least squares support vector machine classifiers. *Neural Process. Lett.* 9: 293–300.**

Google Scholar: [Author Only](#) [Title Only](#) [Author and Title](#)

**Tanaka, K., Choi, J., Cao, Y., and Stacey, G. (2014). Extracellular ATP acts as a damage-associated molecular pattern (DAMP) signal in plants. *Front. Plant Sci.* 5: 446.**

Google Scholar: [Author Only](#) [Title Only](#) [Author and Title](#)

**Tavormina, P., De Coninck, B., Nikonorova, N., De Smet, I., and Cammue, B.P.A. (2015). The plant peptidome: An expanding repertoire of structural features and biological functions. *Plant Cell* 27: 2095–2118.**

Google Scholar: [Author Only](#) [Title Only](#) [Author and Title](#)

**Thieme, C.J., Rojas-Triana, M., Stecyk, E., Schudoma, C., Zhang, W., Yang, L., Miñambres, M., Walther, D., Schulze, W.X., and Paz-Ares, J. (2015). Endogenous *Arabidopsis* messenger RNAs transported to distant tissues. *Nat. Plants* 1: 1–9.**

Google Scholar: [Author Only](#) [Title Only](#) [Author and Title](#)

**Thomas, M. and Joy, A.T. (2006). *Elements of information theory* (Wiley-Interscience).**

**Torres, M.A., Jones, J.D.G., and Dangl, J.L. (2006). Reactive oxygen species signaling in response to pathogens. *Plant Physiol.* 141: 373–378.**

Google Scholar: [Author Only](#) [Title Only](#) [Author and Title](#)

**Tripathi, D., Zhang, T., Koo, A.J., Stacey, G., and Tanaka, K. (2018). Extracellular ATP Acts on Jasmonate Signaling to Reinforce Plant Defense. *Plant Physiol.* 176: 511–523.**

Google Scholar: [Author Only](#) [Title Only](#) [Author and Title](#)

**Wang, G., Zhang, Y., Li, C., Wang, X., and Fletcher, J.C. (2022). Signaling peptides direct the art of rebirth. *Trends Plant Sci.***

Google Scholar: [Author Only](#) [Title Only](#) [Author and Title](#)

**Westlake, T.J., Ricci, W.A., Popescu, G.V., and Popescu, S.C. (2015). Dimerization and thiol sensitivity of the salicylic acid binding thimet oligopeptidases TOP1 and TOP2 define their functions in redox-sensitive cellular pathways. *Front. Plant Sci.* 6.**

Google Scholar: [Author Only](#) [Title Only](#) [Author and Title](#)

**Whalen, M.C., Innes, R.W., Bent, A.F., and Staskawicz, B.J. (1991). Identification of *Pseudomonas syringae* pathogens of *Arabidopsis* and a bacterial locus determining avirulence on both *Arabidopsis* and soybean. *Plant Cell* 3: 49–59.**

Google Scholar: [Author Only](#) [Title Only](#) [Author and Title](#)

**van Wijk, K.J. (2015). Protein Maturation and Proteolysis in Plant Plastids, Mitochondria, and Peroxisomes. *Annu. Rev. Plant Biol.* 66: 75–111.**

Google Scholar: [Author Only](#) [Title Only](#) [Author and Title](#)

**Xing, S., Miao, J., Li, S., Qin, G., Tang, S., Li, H., Gu, H., and Qu, L.-J. (2010). Disruption of the 1-deoxy-D-xylulose-5-phosphate reductoisomerase (DXR) gene results in albino, dwarf and defects in trichome initiation and stomata closure in *Arabidopsis*. *Cell Res.* 20: 688–700.**

Google Scholar: [Author Only](#) [Title Only](#) [Author and Title](#)

**Yoshimoto, K., Jikumaru, Y., Kamiya, Y., Kusano, M., Consonni, C., Panstruga, R., Ohsumi, Y., and Shirasu, K. (2009). Autophagy negatively regulates cell death by controlling NPR1-dependent salicylic acid signaling during senescence and the innate immune response in arabidopsis. *Plant Cell* 21: 2914–2927.**

Google Scholar: [Author Only](#) [Title Only](#) [Author and Title](#)

**Zancani, M., Braidot, E., Filippi, A., and Lippe, G. (2020). Structural and functional properties of plant mitochondrial F-ATP synthase. *Mitochondrion* 53: 178–193.**

Google Scholar: [Author Only](#) [Title Only](#) [Author and Title](#)

**Ziemann, S., van der Linde, K., Lahrmann, U., Acar, B., Kaschani, F., Colby, T., Kaiser, M., Ding, Y., Schmelz, E., and Huffaker, A (2018). An apoplastic peptide activates salicylic acid signalling in maize. *Nat. plants* 4: 172–180.**

Google Scholar: [Author Only](#) [Title Only](#) [Author and Title](#)

**Zipfel, C., Kunze, G., Chinchilla, D., Caniard, A., Jones, J.D.G., Boller, T., and Felix, G. (2006). Perception of the bacterial PAMP EF-Tu by the receptor EFR restricts *Agrobacterium*-mediated transformation. *Cell* 125: 749–760.**

Google Scholar: [Author Only](#) [Title Only](#) [Author and Title](#)

**Zurbriggen, M.D., Carrillo, N., and Hajirezaei, M.R. (2010). ROS signaling in the hypersensitive response: When, where and what for? *Plant Signal. Behav.* 5: 393–396.**

Google Scholar: [Author Only](#) [Title Only](#) [Author and Title](#)
